# 1 **Structural and mutational analysis of the ribosome-** 2 **arresting human XBP1u**

3 Vivekanandan Shanmuganathan<sup>1#</sup>, Nina Schiller<sup>2#</sup>, Anastasia  
4 Magoulopoulou<sup>2</sup>, Jingdong Cheng<sup>1</sup>, Katharina Braunger<sup>1</sup>, Florian Cymer<sup>2</sup>,  
5 Otto Berninghausen<sup>1</sup>, Birgitta Beatrix<sup>1</sup>, Kenji Kohno<sup>4</sup>, Gunnar von Heijne<sup>2,3\*</sup>  
6 and Roland Beckmann<sup>1\*</sup>

7

8 <sup>1</sup>Gene Center, Department of Biochemistry and Center for integrated Protein  
9 Science Munich (CiPSM), Ludwig-Maximilians-Universität München, Feodor-  
10 Lynen-Strasse 25, 81377 Munich, Germany

11 <sup>2</sup>Department of Biochemistry and Biophysics, Stockholm University, SE-106  
12 91 Stockholm, Sweden

13 <sup>3</sup>Science for Life Laboratory Stockholm University, Box 1031, SE-171 21  
14 Solna, Sweden

15 <sup>4</sup>Nara Institute of Science and Technology, NAIST, 8916-5 Takayama, Ikoma,  
16 Nara 630-0192, Japan

17

18 #These authors contribute equally to this work.

19 \*To whom correspondence should be addressed.

20 Correspondence: [beckmann@genzentrum.lmu.de](mailto:beckmann@genzentrum.lmu.de),  
21 [gunnar.von.heijne@dbb.su.se](mailto:gunnar.von.heijne@dbb.su.se)

22

23 **Key words:** translational pausing, ribosome, XBP1

24 **Running title:** Nascent chain mediated translational pause

25 **Abbreviations:** AP = arrest peptide

## 26 **Abstract**

27 XBP1u, a central component of the unfolded protein response (UPR), is a  
28 mammalian protein containing a functionally critical translational arrest  
29 peptide (AP). Here, we present a 3 Å cryo-EM structure of the stalled human  
30 XBP1u AP. It forms a unique turn in the upper part of the ribosomal exit tunnel  
31 and causes a subtle distortion of the peptidyl transferase center, explaining  
32 the temporary translational arrest induced by XBP1u. During ribosomal  
33 pausing the hydrophobic region 2 (HR2) of XBP1u is recognized by SRP, but  
34 fails to efficiently gate the Sec61 translocon. An exhaustive mutagenesis scan  
35 of the XBP1u AP revealed that only 10 out of 21 mutagenized positions in the  
36 XBP1u AP are optimal with respect to translational arrest activity. Thus,  
37 XBP1u has evolved to induce an intermediate level of translational arrest,  
38 allowing efficient targeting by SRP without activating the Sec61 channel and  
39 thereby serving its central function in the UPR.

## 40 **Introduction**

41 Most secretory and membrane proteins traverse the endoplasmic reticulum  
42 (ER), where they are modified and folded before continuing their journey  
43 towards their respective destinations. The ER handles approximately one-third  
44 of the proteome and the flux of proteins entering the ER lumen varies widely,  
45 primarily depending on the demands of the specific cell type. The ER is also  
46 responsible for maintaining calcium homeostasis and is involved in lipid  
47 biosynthesis (Fagone and Jackowski, 2009; Görlach et al., 2006). A number  
48 of circumstances can alter the folding and modifying capacity of the ER, such  
49 as glucose deprivation, calcium imbalance, hypoxia, or viral infection, and  
50 thereby alter the demand on ER activity, as shown, e.g., in B cell  
51 differentiation (Grootjans et al., 2016). The central cellular response  
52 mechanism that alleviates ER stress and adjusts ER activity levels is the  
53 unfolded protein response (UPR) (Walter and Ron, 2011). In mammalian  
54 cells, this pathway is mainly mediated by three transmembrane sensors that  
55 are located in the ER membrane: inositol requiring enzyme 1 alpha (IRE1 $\alpha$ ),  
56 activating transcription factor 6 (ATF6), and pancreatic endoplasmic reticulum  
57 kinase (PERK) (Walter and Ron, 2011).

58 Of these three sensors, the evolutionarily most conserved is IRE1 (here, IRE1  
59 denotes mammalian IRE1 $\alpha$  and/or yeast Ire1); in lower eukaryotes such as  
60 yeast, it is the only known sensor mediating the UPR (Mori, 2009). IRE1 is a  
61 single-spanning membrane protein with three domains: a luminal unfolded  
62 protein-sensing domain and cytosolic bifunctional serine/threonine kinase and  
63 endo-ribonuclease domains. In unstressed cells, Hsp70 family chaperone BiP  
64 binds the luminal region of IRE1 and keeps IRE1 in an inactive monomeric

65 state. Increasing levels of misfolded proteins during ER stress sequester BiP  
66 away from, leading to active dimer (Bertolotti et al., 2000; Okamura et al.,  
67 2000) and further highly activated by cluster formation (Aragón et al., 2009;  
68 Credle et al., 2005; Kimata et al., 2007; Korennykh et al., 2009; Li et al., 2010)  
69 In yeast, direct binding of unfolded proteins to the luminal core regions of  
70 IRE1-dimer or -oligomer is required for the activation (Gardner and Walter,  
71 2011; Kimata et al., 2007), however, in mammals, direct binding model has  
72 been a matter of debate (Kohno, 2010). The cytosolic domain of activated  
73 IRE1 $\alpha$  then splices the *XBP1u* (X-box binding protein-1 unspliced) mRNA on  
74 the ER membrane, producing *XBP1s* (spliced) mRNA, which codes for an  
75 active transcription factor. The splicing reaction involves removal of a 26-nt  
76 intron from *XBP1u* mRNA, which leads to a translational frame-shift and the  
77 replacement of C-terminal segment in XBP1u downstream of the splicing site  
78 (Calfon et al., 2002; Yoshida et al., 2001). Once translocated to the nucleus,  
79 the XBP1s transcription factor activates genes encoding ER-resident  
80 chaperones and folding enzymes, the components of ER associated protein  
81 degradation and the proteins that function in secretory pathway, which  
82 together increase ER size and activity (Figure 1) (Shaffer et al., 2004; Sriburi  
83 et al., 2004).

84 IRE1 $\alpha$  is also involved in a process called regulated IRE1-dependent decay of  
85 mRNA (RIDD), where promiscuous cleavage and therefore inactivation of  
86 mRNA by IRE1 $\alpha$  during ER stress reduces protein influx to the ER (Hollien,  
87 Julie and Weissman, 2006; Hollien et al., 2009). It has been shown that active  
88 IRE1 $\alpha$  can associate with the Sec61 translocon (Plumb et al., 2015), thereby  
89 facilitating its access to mRNAs coding for secretory and membrane proteins.

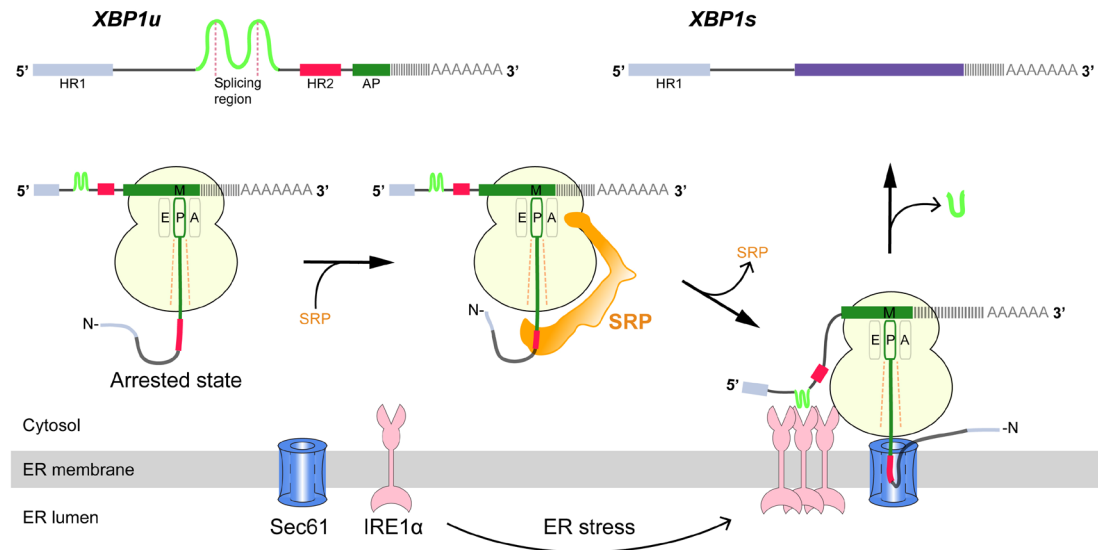

**Figure 1. Schematic representation of the IRE1α-XBP1u pathway mediating UPR.**

Interaction of the XBP1u nascent chain with the ribosomal exit tunnel leads to translational pausing, resulting in SRP recruitment to the RNC, followed by targeting to Sec61 on the ER membrane. IRE1α localized near Sec61 during ER stress can splice *XBP1u* mRNA to *XBP1s* mRNA, which acts as transcription factor in alleviating ER stress.

90

91 Cytosolic *XBP1u* mRNA is recruited into the proximity of IRE1α on the ER  
92 membrane via an ingenious mechanism (Figure 1). XBP1u has two  
93 hydrophobic domains, HR1 and HR2, and a C-terminal translational arrest  
94 peptide (AP) of about 26 residues which pauses the translating ribosome  
95 when residing in the ribosomal exit tunnel (Yanagitani et al., 2011, 2009).  
96 During this temporary pause in translation, HR2 is exposed outside the  
97 ribosome exit tunnel and can recruit the signal recognition particle (SRP). As  
98 a result, the paused XBP1u ribosome–nascent-chain mRNA complex  
99 (XBP1u-RNC) is targeted to the Sec61 protein-conducting channel on ER  
100 membrane, where mRNA splicing by IRE1α is now possible (Kanda et al.,  
101 2016; Plumb et al., 2015). Given the moderate hydrophobicity of HR2,

102 translational pausing is required for efficient recruitment of SRP by the  
103 stabilized XBP1u-RNC, and is critical for proper IRE1 $\alpha$ -mediated UPR (Kanda  
104 et al., 2016; Plumb et al., 2015).

105 Many studies have focused on the role of IRE1 $\alpha$  in the UPR, but the  
106 molecular underpinnings of XBP1u-induced translational pausing have not  
107 been defined. Here, we have used two complementary approaches, structural  
108 analysis and saturation mutagenesis, in order to decipher the structural basis  
109 and mechanism of the XBP1u AP activity. We show that the XBP1u AP forms  
110 a unique turn in the upper part of the tunnel and makes extensive contacts  
111 with ribosomal tunnel components. Notably, the conformation of the XBP1u  
112 AP is unaltered within the ribosomal tunnel when the paused complex is  
113 bound to SRP or to the Sec61 complex, implying that the XBP1u AP does not  
114 function as a force-sensitive switch in the UPR pathway *in vivo*. By saturation  
115 mutagenesis, we observe that most but not all XBP1u residues constituting  
116 the turn are optimized for translational arrest. Finally, we identify XBP1u AP  
117 variants of increased arrest potency, which may be useful as tools for *in vitro*  
118 force-sensing studies.

## 119 **Results**

### 120 **Generation and cryo-EM analysis of XBP1u-paused ribosome-nascent** 121 **chain complexes**

122 We structurally characterized the paused ribosomal complex (XBP1u-RNC)  
123 by cryo-EM and single particle analysis using a mutant version of XBP1u  
124 (S255A, full length numbering), which was shown previously to pause  
125 ribosomes more efficiently than wildtype XBP1u (Yanagitani et al., 2011). The

126 construct used for the RNC preparation encompassed only the HR2 domain  
 127 and the XBP1u pausing sequence denoted as AP, with N- and C-terminal  
 128 tags for affinity purification and detection purposes (for clarity we number the  
 129 residues according to their position in the full-length protein), Figure 2A.

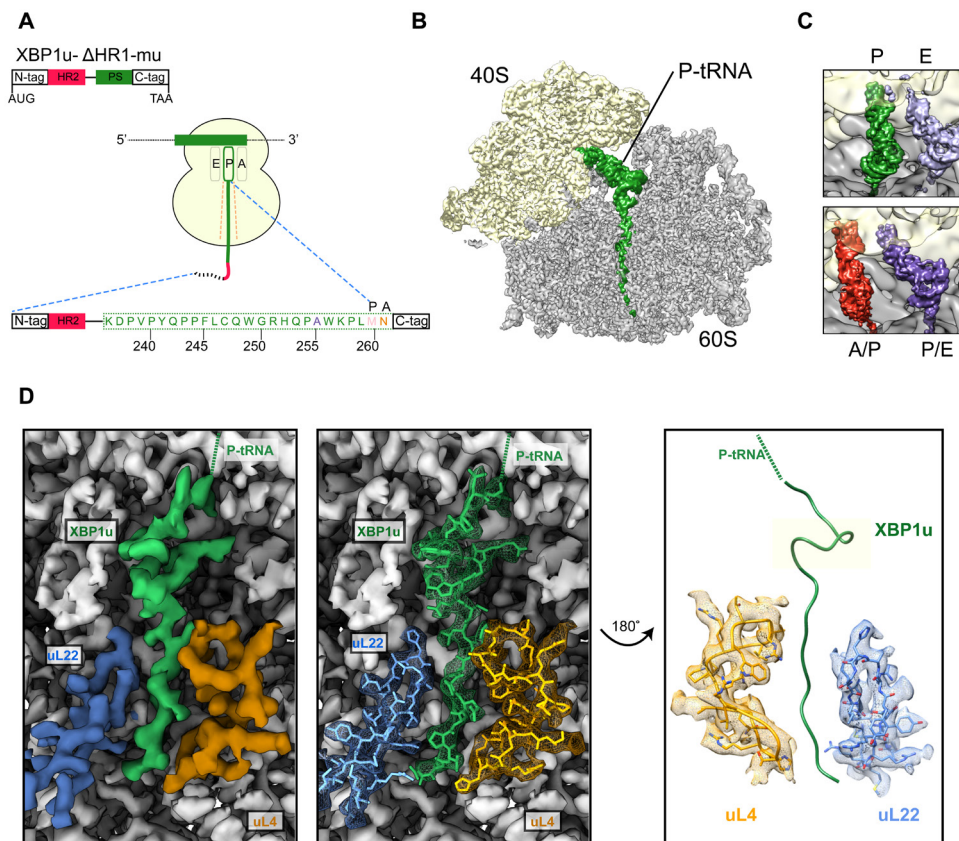

130

131

## Figure 2. Structural analysis of XBP1u mediated ribosomal pausing.

**(A)** Schematic representation of the XBP1u-del-HR1-mu construct used for purification. The construct encodes N-tag, hydrophobic region 2 (red), AP (green) and C-tag. Model for nascent chain in the tunnel, and P-site and A-site positions were denoted as well. **(B)** Traverse section of cryo-EM structure of the paused XBP1u-RNC showing the peptidyl-tRNA (green) with small and large subunits colored in yellow and grey respectively. **(C)** Close-up views showing the two tRNA states of the XBP1u-RNC, post (top panel) and rotated (bottom panel). **(D)** Overview of the XBP1u nascent chain in the ribosomal tunnel. Surface representation of the electron density: P-tRNA (green), uL4 (orange), uL22 (blue) and ribosomal tunnel (grey).

132 Following translation of the capped *XBP1u* mRNA in a rabbit reticulocyte  
133 lysate (RRL) *in vitro* translation system, paused ribosomal complexes were  
134 purified using the N-terminal His-tag on XBP1u and subjected to cryo-EM  
135 analysis. Processing of the cryo-EM dataset yielded a total of 531,952  
136 ribosomal particles (Figure S1), and multiple rounds of *in silico* sorting for  
137 homogenous populations resulted in ~60% of programmed ribosomes (Figure  
138 2B), with the major population of ribosomes in the non-rotated state (~42%, P-  
139 and E- site tRNA) and a minor population in the rotated, not yet fully  
140 translocated state (~18%, A/P- and P/E- site tRNA, Figure 2C). In both states  
141 we observed strong density for the XBP1u chain, which was connected to  
142 tRNA and extended down the ribosomal exit tunnel. The average resolutions  
143 of the paused complexes were 3.0 Å (Figure S2A) for the post state and 3.1 Å  
144 (Figure S2B) for the rotated hybrid state, respectively, with the ribosomal core  
145 reaching a resolution of 2.5 Å (Figure S2A). A major portion of the XBP1u  
146 peptide in the exit tunnel was resolved to between 3.0 – 3.5 Å for both classes  
147 (Figure S3A, B), whereas the resolution in the lower part of the tunnel near  
148 the exit was worse than 4 Å, apparently due to flexibility of the nascent chain.  
149 We could model 24 amino acid residues of XBP1u, covering the entire AP. In  
150 both states, we observed that the ribosomes are paused with Met260  
151 connected to the tRNA in the P-site, in full agreement with findings from  
152 ribosome-profiling analysis of mouse embryonic cells (Ingolia et al., 2011). In  
153 the following sections, we will refer to the post-state paused RNC complex for  
154 further analysis and discussion, since the nascent chain conformation is  
155 indistinguishable in both states.

156



## 157 **XBP1u nascent chain in the ribosomal tunnel**

158 The majority of the visible XBP1u nascent chain adopts an extended  
159 conformation, except in the upper part of the tunnel where the AP forms a  
160 prominent turn (Figure 2D). The turn is comprised of eight residues from  
161 W249 to W256, and involves the C-terminal half of the characterized XBP1u  
162 AP. Notably, the beginning of the turn is only four residues away from the  
163 PTC, suggesting that the turn within the tunnel may be critical for the pausing  
164 activity of XBP1u. Of the eight turn-forming residues, six have been previously  
165 shown to be critical for pausing by alanine scanning mutagenesis (Yanagitani  
166 et al., 2011) , c.f., below. Interestingly, residue 255 that has been mutated  
167 from Ser to Ala in the sequence used here is part of the turn: A255 is tightly  
168 packed in the structure and the larger Ser residue may be sterically more  
169 problematic, possibly explaining why the S255A mutation makes the XBP1u a  
170 stronger AP.

171 The turn is located in close proximity to the PTC, above the constriction at  
172 uL22 and uL4, the narrowest portion of the tunnel. The conformation of the  
173 XBP1u peptide in the lower parts of the tunnel is similar to that observed for a  
174 non-pausing mammalian nascent chain in the mammalian ribosome  
175 (Voorhees and Hegde, 2015) (Figure S3C - D) and to other known viral and  
176 bacterial APs (CMV, MifM and VemP, Figure S3E - G) (Matheisl et al., 2015;  
177 Sohmen et al., 2015; Su et al., 2017). However, the turn observed for XBP1u  
178 is unique, and is located in a part of the tunnel where some other APs adopt  
179  $\alpha$ -helical secondary structure (Figure S3E - G).

## 180 **Interactions stabilizing the XBP1u peptide conformation**

181 The turn in the XBP1u AP makes several key interactions with the tunnel wall  
182 and is in part in close proximity to the PTC. It is framed by two tryptophan  
183 residues (W249 & W256) and protrudes into a hydrophobic crevice in the  
184 tunnel, causing the displacement of the base G3904 (Figure 3E). The  
185 corresponding base in prokaryotes, A2058, constitutes, together with A2059,  
186 the so-called A-stretch in the *E. coli* ribosome which is critical for macrolide  
187 binding and drug-mediated ribosome stalling (Wilson, 2009). Moreover, it has  
188 been implicated in directly sensing the presence of the nascent peptide in the  
189 exit tunnel. Therefore, it is possible that this region evolved also in eukaryotes  
190 to contribute to the sensing of nascent chains in the tunnel. The positively  
191 charged side chain of Arg251 in XBP1u forms a stabilizing salt bridge with the  
192 phosphate of A4388 (Figure 3F), whereas Gly250 and Gln253 engage in  
193 hydrogen bonds with A3908 and U4555, respectively (Figure 3G, I). Finally,  
194 Trp249 stacks internally onto Gln248 of XBP1u, and the backbone carbonyl of  
195 Arg251 makes a hydrogen bond to Lys257 within the XBP1u nascent chain  
196 (Figure 3A, 3B). Lys257 also stacks onto U4532, and this stacking interaction  
197 might influence the movement of the critical PTC base U4531 (U2585 in *E.*  
198 *coli*) (Figure 3D). Taken together, five of the eight residues that constitute the  
199 turn engage in contacts with the tunnel.

200 In the lower part of the tunnel, Tyr241 of XBP1u stacks with C2794 of 28S  
201 rRNA (Figure 3H). Three of the remaining interactions of the nascent chain in  
202 the lower tunnel region are mediated by the constriction proteins uL4 and  
203 uL22, respectively. Here, Arg71 and Ser87 of uL4, as well as Arg128 of uL22  
204 make contacts mostly with the backbone of the nascent chain (Figure 3J - L).

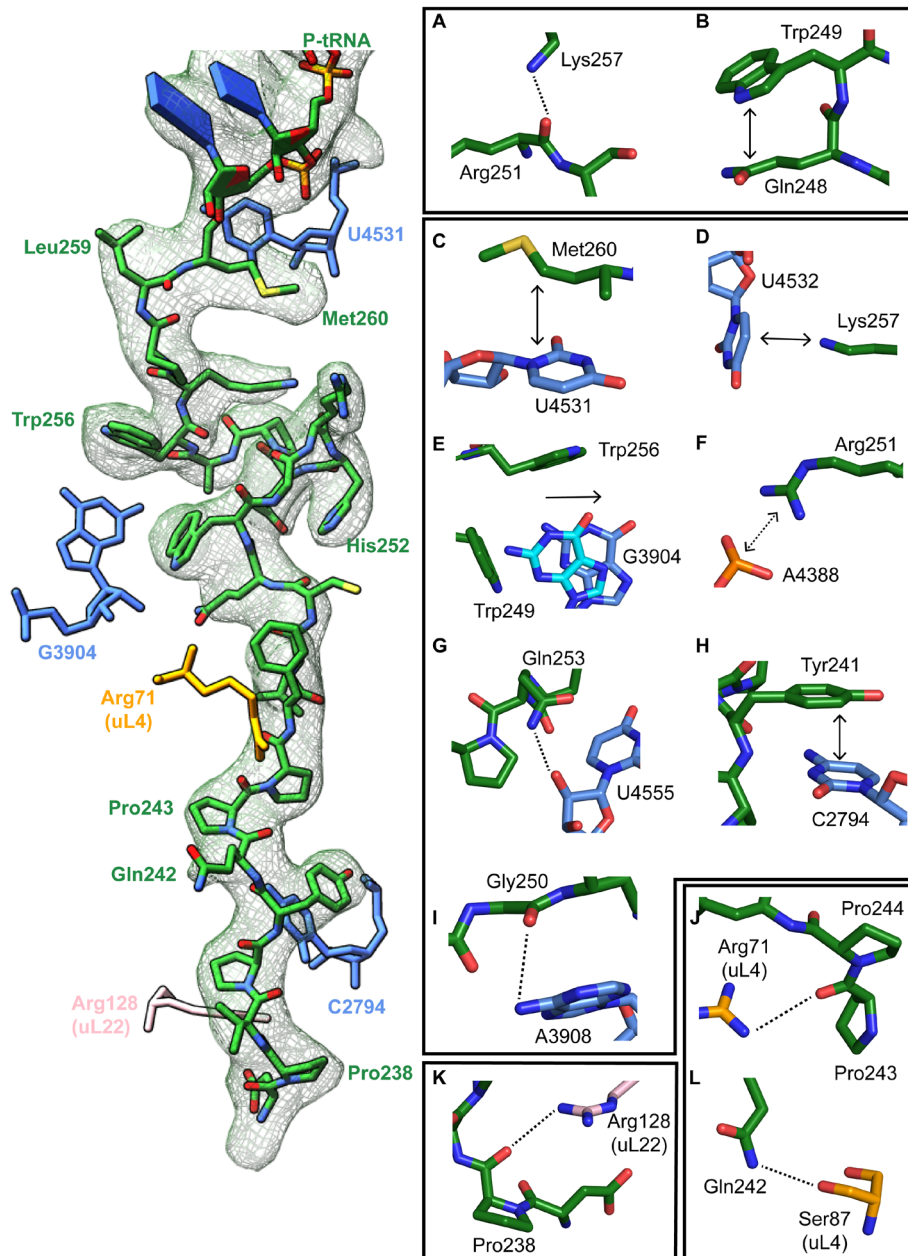

205

### Figure 3. Stabilizing interactions of XBP1u nascent chain with the ribosomal exit tunnel

On the left shown nascent chain model (green) with density (grey mesh), and some interacting 28S rRNA bases and ribosomal protein residues are shown. **(A)** Lys257 of XBP1u (green) is at the hydrogen bond making distance internally within XBP1u residue Arg251. **(B)** Trp249 of the XBP1u stacks internally onto Gln248. **(C)** Met260 of XBP1u makes a hydrophobic interaction with U4531 of 28S rRNA (blue). **(D)** Lys257 stacking with the base U4532 **(E)** Trp256 and Trp249 of XBP1u displace a ribosomal tunnel base G3904 (blue). G3904 conformation with XBP1u is compared with didemnin B treated ribosome (cyan, PDB ID 5LZS). **(F)** Arg251 of XBP1u makes a salt-bridge interaction with the exit tunnel base A4388. **(I, G)** Gly250 and Gln253 of XBP1u are in the distance for making hydrogen bond interaction with 28s rRNA bases A3908 and U4555. **(H)** Tyr241 of XBP1u stacks onto C2794. **(J-L)** Constriction site protein residues making interaction with XBP1u are shown: uL4 (orange) and uL22 (pink).

206

### 207 PTC silencing by the XBP1u peptide

208 Next, we asked how the unique conformation of the XBP1u peptide in the  
209 tunnel results in silencing of the peptidyltransferase activity to cause  
210 ribosomal pausing. To that end, we compared the observed PTC  
211 conformation with the available mammalian and yeast ribosome structures,  
212 either with or without accommodated A-site tRNA, respectively. Since the  
213 XBP1u-stalled RNC carries P- and E-site tRNAs but has an empty A-site, we  
214 first compared it to the reconstruction of a human 80S ribosome in the post  
215 state without A-site tRNA (Behrmann et al., 2015) and of a rabbit 80S  
216 ribosome in a pre-accommodation state trapped by didemnin B treatment  
217 (Shao et al., 2016) (Figure S4). Both 80S ribosomes display the classical  
218 uninduced state of the PTC before full accommodation of tRNA in the A-site,  
219 first described for bacterial ribosomes (Martin Schmeing et al., 2005). It is  
220 characterized by U4531 (U2585 in *E. coli*) in a typical upward conformation,  
221 and C4398 (C2452 in *E. coli*), which is part of the so-called A-site crevice  
222 (Hansen et al., 2003), in the typical out-position (Figure S4). In contrast to

223 some bacterial APs, we observed U4531 (U2585) in the XBP1u-stalled RNC  
224 in its canonical upward conformation. Although it interacts with the side chain  
225 of Met260 (Figure 3C), it appears that this base would not be hindered to  
226 switch downwards upon A-site accommodation to adopt the induced  
227 conformation. However, C4398 (C2452) is in the closed conformation (Figure  
228 4A, S4), a position that under normal conditions is observed only after A-site  
229 accommodation, as in the reconstruction of the yeast 80S ribosome with A-,  
230 P-site tRNA and eIF5a (PDB 5GAK) (Schmidt et al., 2015). C4398 (C2452) is  
231 stabilized in the closed conformation by Leu259, which, in contrast to Met260,  
232 cannot be mutated to alanine without almost entirely losing stalling activity  
233 (see below). Notably, these bases have both been implicated in A-site tRNA  
234 accommodation and peptidyl transferase activity. Therefore, the premature  
235 positioning of C4398 (C2452) in the closed conformation provides a  
236 mechanistic explanation for PTC inactivation by inhibition of A-site tRNA  
237 accommodation (Figure 4B). Along the same line, in its observed position  
238 Leu259, when interacting with C4398 (C2452), would simply clash with the  
239 incoming Asn261 tRNA (Figure 4C). Therefore, inhibition or delay of tRNA  
240 accommodation into the A-site appears to be the main mechanism for  
241 translational pausing by the XBP1u AP. This idea is further supported by the  
242 observation that we do not find a stable class of ribosomes in our population  
243 of stalled RNCs that carry a canonical A-site tRNA. Moreover, it can be easily  
244 imagined how pulling force applied to the nascent chain can rectify the only  
245 mildly perturbed geometry of the PTC and thereby alleviate stalling. Taken  
246 together, the entire XBP1u AP contributes to pausing by interacting with the

247 tunnel to form a unique turn structure and, facilitated by this structure,  
248 stabilizing the PTC in a conformation that disfavors A-site accommodation.

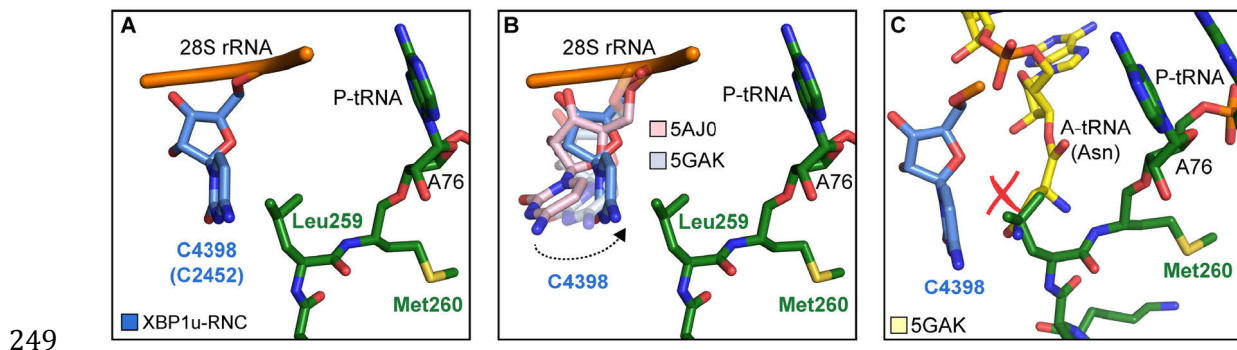

**Figure 4. Silencing of peptidyl transferase activity by XBP1u nascent chain.**

(A) Conformation of C4398 in XBP1u-RNC (blue). (B) C4398 conformation in the paused complex in comparison with A-site accommodated 80S (PDB ID 5GAK, softblue) and with a post state 80S without an A-site tRNA (PDB ID 5AJ0, softpink) (C) Model of an incoming A-site tRNA (yellow, PDB ID 5GAK) clashes with Leu259 of XBP1u. Accommodation of A-site tRNA is prevented by XBP1u.

250

### 251 **Cryo-EM structure of XBP1u-RNC engaged with SRP and Sec61**

252 The paused XBP1u-RNC complex has to be co-translationally targeted to and  
253 localized on Sec61 at the ER via the SRP pathway for efficient IRE1 $\alpha$   
254 mediated splicing of the XBP1u mRNA (Kanda et al., 2016; Plumb et al.,  
255 2015). Due to the AP-triggered prolonged dwell time on the ribosome, the  
256 HR2 domain of XBP1u gains sufficient affinity to be recognized by SRP. In  
257 order to analyze this special mode of SRP recruitment, and to study the state  
258 of the nascent chain within the tunnel when engaged by SRP, we generated  
259 cryo-EM structures of the paused XBP1u-RNC complex reconstituted *in vitro*  
260 with mammalian SRP or the Sec61 complex.

261 We reconstituted the purified paused XBP1u-RNC with dog SRP *in vitro* (see  
262 Methods for details) and subjected the sample to cryo-EM analysis. After  
263 sorting for the presence of SRP and further refinement, a final reconstruction  
264 was obtained representing the paused XBP1u-RNC in the post state bound to  
265 SRP. We found the characteristic L-shaped density of SRP with its Alu-  
266 domain bound to the subunit interface connecting to the S-domain at the exit  
267 tunnel (Figure 5A). The final reconstruction had an average resolution of 3.7 Å  
268 (Figure S2C) and the SRP itself was resolved between 5 – 10 Å (Figure S5D).  
269 A recently published engaged SRP model (PDB 3JAJ) (Voorhees and Hegde,  
270 2015) fits well with our observed density, and individual segments were  
271 manually inspected and fitted as rigid bodies in Coot. Analysis of the  
272 hydrophobic groove of the SRP54 M-domain, which is known to mediate the  
273 recognition and binding of canonical signal sequences, revealed a clear rod-  
274 like density resembling that of a signal sequence (Figure 5B). Since the only  
275 sufficiently hydrophobic peptide stretch available is HR2 of XBP1u, it is highly  
276 likely that this density indeed represents the SRP-bound HR2 domain, bound  
277 in a conformation indistinguishable from that of normal SRP-bound signal  
278 sequences. Hence, we conclude that the exposed HR2 domain on the paused  
279 XBP1u-RNC forms a helical structure upon successful SRP recruitment,  
280 which makes a canonical interaction with the M-domain of SRP54. Notably,  
281 the nascent chain density was sufficiently well resolved within the tunnel of  
282 the XBP1u-RNC-SRP complex to allow for molecular model building. At the  
283 given resolution, the conformation of the AP is identical in the presence of  
284 SRP to that of the RNC alone. The finding that SRP binding to paused  
285 XBP1u-RNCs does not lead to perturbation of the nascent chain within the

286 tunnel strongly suggests that this state maintains the RNC in the paused  
287 state.

288 Next, we reconstituted the purified XBP1u-RNC complex with dog PKRM,  
289 thereby allowing the XBP1u-RNC-Sec61 complex to form, which should  
290 represent the XBP1u-RNC after targeting to the ER. Cryo-EM analysis after  
291 solubilization with digitonin resulted in a complex paused in the post state and  
292 indeed bound to Sec61. We observed clear density for the Sec61 translocon  
293 at the tunnel exit and for the P-site tRNA-attached to nascent chain in the  
294 ribosomal tunnel. The average resolution was 3.9 Å (Figure S2D) and the  
295 Sec61 complex resolved to a modest resolution of around 8 Å (Figure S5C),  
296 due to flexibility as observed before. We performed flexible fitting of the Sec61  
297 structure based on the position of the transmembrane segments in order to  
298 analyze the functional state of the translocon and search for additional density  
299 possibly representing the HR2 motif. When comparing with known structures  
300 of Sec61, we found that our structure represented the idle state with the  
301 lateral gate of the translocon, mainly formed by TM2 and TM7, in a closed  
302 conformation (Figure 5C). We could not identify any additional density for the  
303 HR2 domain of XBP1u on or near the Sec61 complex, indicating a rather  
304 weak or transient interaction. Considering the low hydrophobicity of the HR2  
305 domain and previous biochemical evidence that less than 10% of XBP1u  
306 becomes integrated into the ER membrane (Plumb et al., 2015), our data are  
307 in full agreement with the idea that HR2 can interact with, but cannot  
308 productively engage and gate, the Sec61 translocon.

309 The structure of the XBP1u nascent chain in the XBP1u-RNC-Sec61-complex  
310 is indistinguishable from the structures observed in the XBP1u-RNC and the



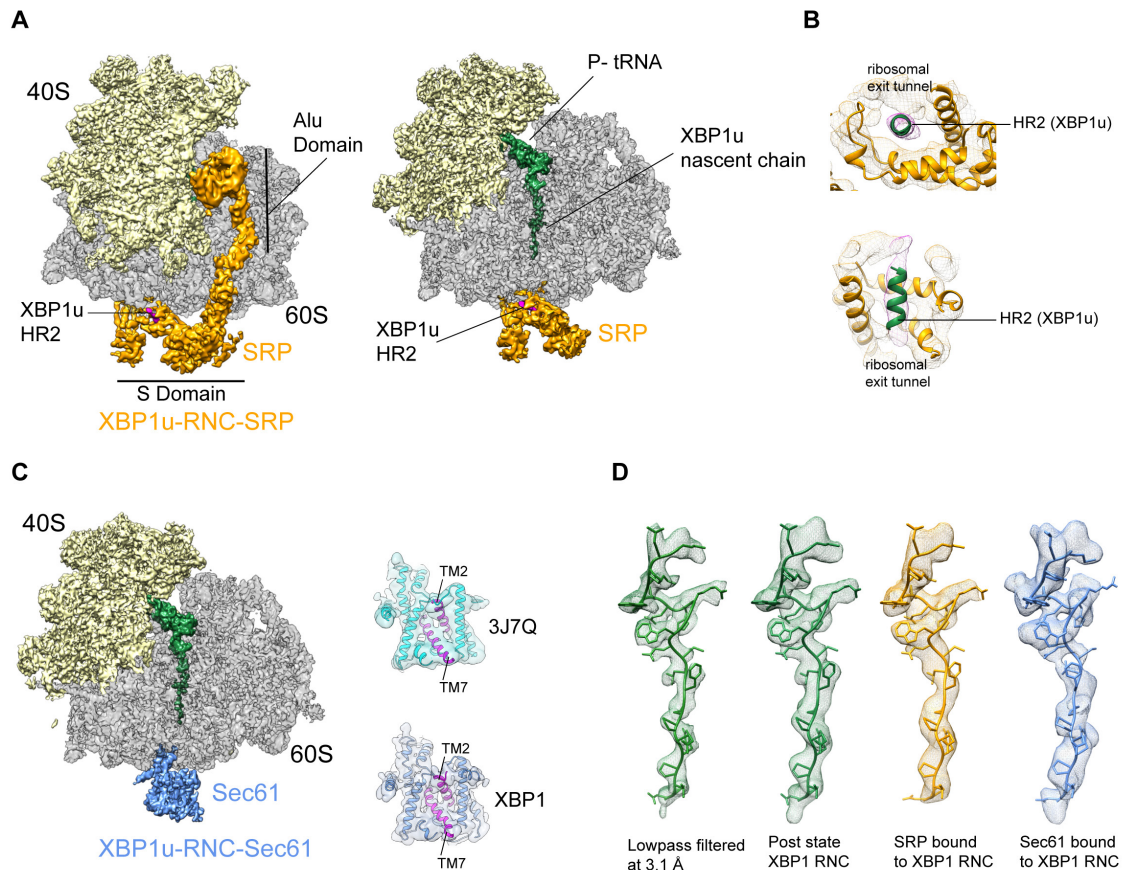

**Figure 5. Cryo-EM structures of XBP1u-RNC with SRP and Sec61.**

**(A)** Cryo-EM reconstruction of XBP1u-RNC with SRP: small (yellow), large (grey), SRP (orange) and hydrophobic region 2 of XBP1u (purple). Same view, a traverse section is shown with XBP1u nascent chain and P-site tRNA (green). **(B)** Close-up view of SRP54 M-domain with a top and cross sectional view showing HR2 of XBP1u. **(C)** Sec61 bound to paused XBP1u-RNC. Cross sectional view: Sec61 (blue), small and large ribosomal subunits, and nascent chain density shown. Idle Sec61 model (cyan, PDB ID 3J7Q) and Sec61 model bound to XBP1u-RNC (blue). Lateral gate is highlighted in both models (purple). **(D)** Unaltered nascent chain in three different states: RNC alone (green), RNC with SRP (orange) and RNC with Sec61 (blue). Density of the nascent chain also colored respectively.

318

319 XBP1u-RNC-SRP complexes, with RMSDs between the structures in the  
 320 range of about 1 Å (Figure 5D). This finding strongly suggests that there is no  
 321 change in the pausing efficiency during or after successful targeting to the ER  
 322 membrane, and XBP1u is therefore unlikely to act as a force-sensitive  
 323 translational switch in the UPR. Probably the long linker length of 52 amino  
 324 acids between the HR2 domain and the arrest peptide prevents any potential

325 force applied to HR2 upon interaction with SRP or Sec61 to be transmitted to  
326 the XBP1u AP.

### 327 **Saturation mutagenesis of the XBP1u pausing motif**

328 With the structure in hand, we further characterized the XBP1u AP by  
329 saturation mutagenesis. To this end, we placed the XBP1u AP at a variable  
330 distance downstream of a hydrophobic segment (H segment) that can  
331 generate a pulling force on the nascent chain during *in vitro* cotranslational  
332 insertion into rough microsomal membranes (RMs) (Ismail et al., 2012). The  
333 construct is composed of an N-terminal part from *E. coli* leader peptidase  
334 (LepB) with two transmembrane segments (TM1, TM2), followed by a 155-  
335 residue loop, the H segment, a variable-length linker, the 25-residue long  
336 human XBP1u AP (with the S255A mutation), and a 23-residue long C-  
337 terminal tail (Figure 6A, S6). An acceptor site for N-linked glycosylation  
338 located between TM2 and the H segment gets glycosylated by the lumenally  
339 disposed oligosaccharyltransferase (OST) in molecules that are properly  
340 targeted and inserted into the RMs, Figure 6A, while non-glycosylated  
341 molecules are indicative of not properly targeted protein and therefore not  
342 subjected to pulling forces generated during membrane insertion of the H  
343 segment. Hence, only the glycosylated forms of the arrested and full-length  
344 species are used for quantitation.

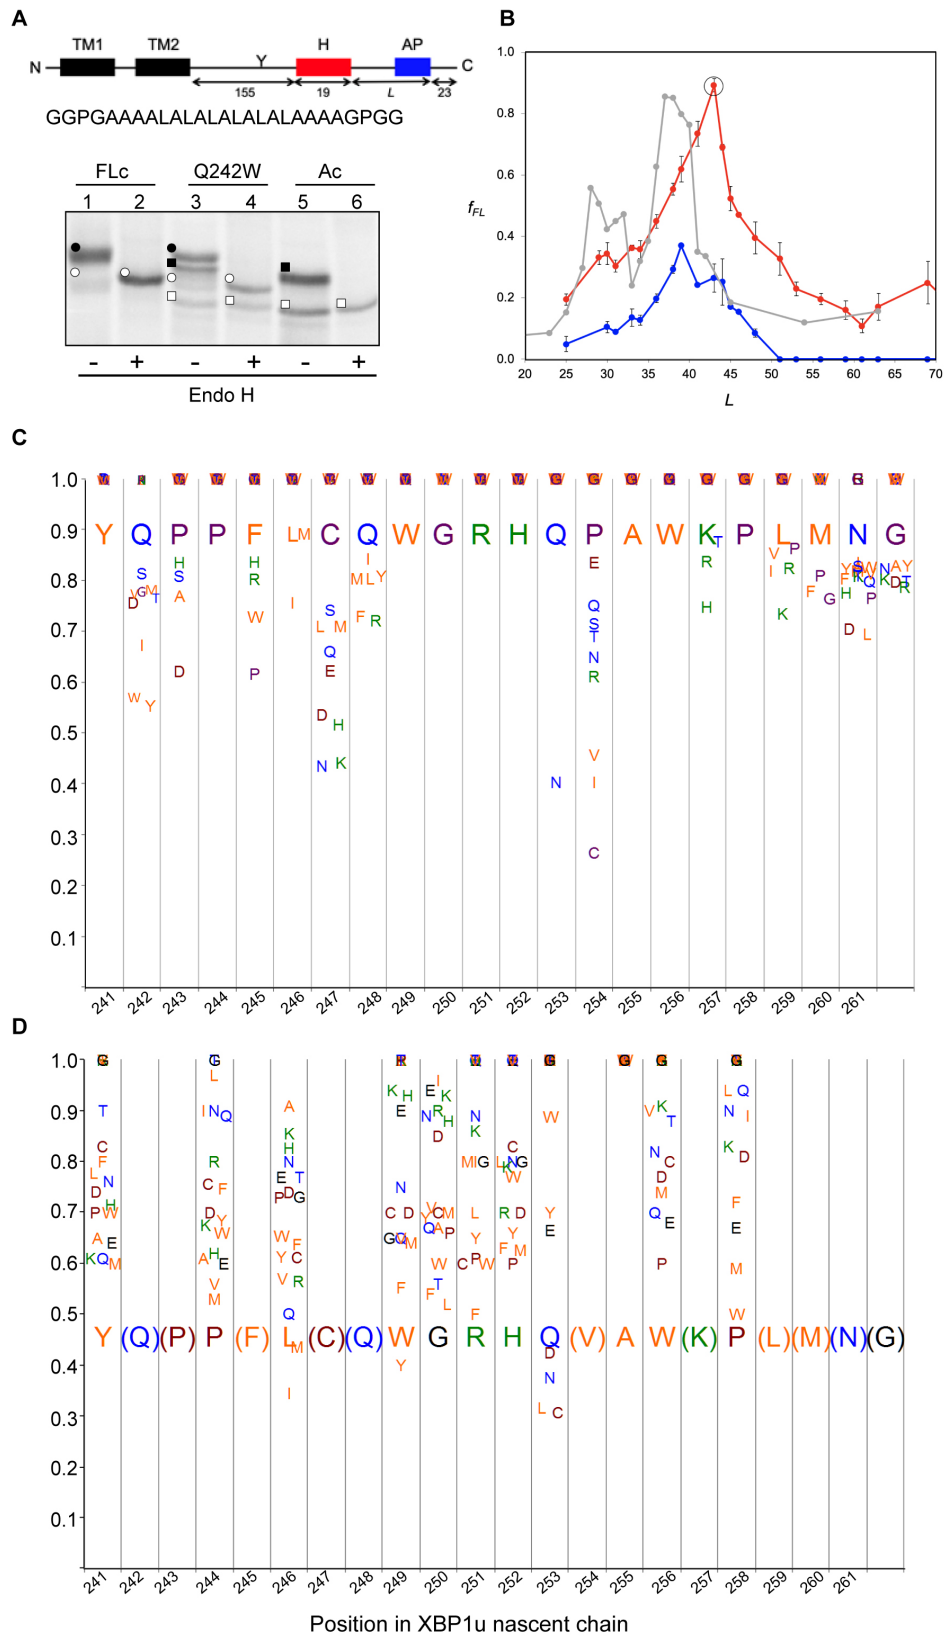

## Figure 6. Force profile measurement and saturation mutagenesis of the XBP1u AP.

**(A)** Construct used for mutagenesis screens. Y indicates the acceptor site for N-linked glycosylation. The amino acid sequence of the H segment and its flanking GGPG...GPGG residues is shown below. SDS-PAGE gel analysis of a full-length control (FLc, arrest-inactivating mutant), a construct with a Q242W mutation, and an arrest control (Ac) with stop codon immediately downstream of the AP. Full-length species are indicated by circles and arrested species by squares. Black and white colors indicate glycosylated and non-glycosylated species, as shown by Endo H digestion. **(B)** Force profiles measured for LepB-XBP1u (S255A) (red curve) and LepB-XBP1u (S255A, P254C) (blue curve) by *in vitro* translation in RRL supplemented with dog pancreas rough microsomes. A force profile measured in the *E. coli*-derived PURE *in vitro* translation system for the same construct but with the SecM(*Ms*) AP (Ismail et al., 2012) is included for comparison (grey curve). **(C)** Saturation mutagenesis of LepB-XBP1u (S255A, L=43). Residues 241–262 were mutated to all 19 other natural amino acids and  $f_{FL}$  values were determined. Residues are color-coded as follows: hydrophobic (orange), polar (blue), basic (green), acidic (brown), and G, P and C (purple). **(D)** Same as in c, but for LepB-XBP1u (P254V, S255A, L=43).

346

347 When a series of constructs with varying linker-lengths is expressed in a  
348 rabbit reticulocyte lysate (RRL) *in vitro* translation system supplemented with  
349 RMs (Ismail et al., 2012), membrane insertion of the H segment is detected  
350 as a peak in a plot of the fraction of full-length protein ( $f_{FL}$ ) against the length  
351 of the linker+AP segment ( $L$ , counting from residue N261), Figure 6B (red  
352 curve).

353 Based on this force profile, we chose the construct with maximal pulling force  
354 for our initial mutagenesis screen ( $L = 43$  residues, compared to  $L = 52$   
355 residues between HR2 and the pausing site in the wildtype XBP1u).

356 Using the LepB-XBP1u[S255A; L=43] construct, we systematically changed  
357 each of the residues in positions 241 to 262 (position 261 corresponds to the

358 A-site tRNA in the stalled peptide (Ingolia et al., 2011) in the XBP1u AP region  
359 to all other amino acids, and measured  $f_{FL}$  for each mutant. The results are  
360 summarized in Figure 6C. The majority of the mutations led to weaker arrest  
361 ( $f_{FL} \approx 1.0$ ), but a surprisingly large number of mutations reduced  $f_{FL}$  from the  
362 starting value of 0.89, indicating stronger arrest variants. Particularly strong  
363 reductions in  $f_{FL}$  were seen for mutations P254→[V,I,C], Q253→N, and  
364 C247→[N, K], that all have  $f_{FL}$  values < 0.5.

### 365 **Structural and mutagenesis hotspots in the XBP1u pausing motif**

366 Some general patterns are discernible from the data in Figure 6C. Many  
367 residues in the XBP1u AP are optimal for efficient translational pausing: Y241,  
368 P244, W249 to H252, A255, W256, and P258. The turn region in the AP  
369 (W249-W256) stands out: six of the eight turn residues are optimal for  
370 pausing potency. In contrast, some residues in the AP are clearly sub-optimal  
371 in terms of pausing potency: Q242, P243, F245, C247, Q253, P254, K257,  
372 and L259.

373 Mutations in three key residues (C247, Q253 and P254) within the AP lead to  
374 particularly strong increases in the pausing strength, with  $f_{FL}$  values in the  
375 range 0.2-0.4 (Figure 6C). C247 is located in the lower part of the tunnel, and  
376 the introduction of charged or polar residues in this position increases the  
377 pausing strength. These residues presumably interact with the ribosomal  
378 tunnel by forming hydrogen bonds or salt-bridges with the phosphate  
379 backbone of rRNA, but the precise interactions cannot be easily predicted  
380 from the structure. Q253 is part of the turn, and when mutated to Asn, the  
381 pausing strength is strongly increased. Q253 is positioned in the immediate  
382 vicinity of the extremely mutation-sensitive residue A255, and shortening the

383 side chain by one carbon might make the turn better accommodated and  
384 more stable in the tunnel. Nine mutations in the neighboring residue P254  
385 also increase the pausing strength, albeit at varying levels. The XBP1u turn is  
386 similar to a  $\beta$ -turn, but does not satisfy all the geometrical parameters and  
387 therefore is probably less stable than a canonical  $\beta$ -turn. Proline is not favored  
388 in  $\beta$ -turns, and its presence in the turn of the XBP1u nascent chain be a result  
389 of evolution favoring weaker translational pausing instead of a highly efficient  
390 arrest.

391 We repeated the screen using a stronger version of the pausing motif with the  
392 mutation of P254→V from our initial screen ( $f_{FL} = 0.46$ ). In this second screen,  
393 we focused on positions for which mutations in the first screen gave  $f_{FL} \approx 1$ , in  
394 order to detect any patterns among the mutations that weakened the  
395 efficiency of the motif. As can be seen in Figure 6D, all positions except A255  
396 showed a graded response to different mutations; for the latter, all mutations  
397 gave  $f_{FL} = 1.0$  (including the back-mutation to the wildtype Ser residue).  
398 Interestingly, mutations Q253→ [L, C] led to a reduction in  $f_{FL}$ , despite the fact  
399 that the same mutations led to an increase in  $f_{FL}$  in the first screen (Figure  
400 6C). This is most likely due to presence of Val instead of Pro in the  
401 neighboring position 254, leading an altered interaction of Q253 with the  
402 tunnel or with the nascent chain itself.

403 We conclude that, although the turn region in the XBP1u AP is nearly optimal  
404 for translational pausing, the AP has not evolved to maximize translational  
405 arrest potency and considerable stronger versions can be obtained.

406

## 407 **Arrest-enhanced variants of the XBP1u AP can be used as force sensors**

408 Bacterial APs have been used as force sensors to measure forces on a  
409 nascent polypeptide chain generated by cotranslational processes such as  
410 protein folding or membrane protein insertion into inner membrane (Ismail et  
411 al., 2012; Nilsson et al., 2017). To evaluate the possible use of mutant XBP1u  
412 APs in such contexts, we re-measured the force profile in Figure 6B using a  
413 strong XBP1u AP carrying the mutations S255→A and P254→C (blue curve  
414 in Figure 6B).  $f_{FL}$  values are reduced throughout, while the shape of the profile  
415 persists. Interestingly, the early peak at  $L \approx 30$  residues seen for the same H-  
416 segment constructs expressed in *E. coli* with the SecM AP (Ismail et al., 2012)  
417 (grey curve, Figure 6B) is not clearly seen in the mammalian force profiles,  
418 suggesting that the H segment interacts differently with the Sec61 and  
419 SecYEG translocons at early stages of membrane insertion. Because the  
420 mutant AP has a Cys residue in position 254, we considered that the  
421 enhanced arrest potency may be due to the formation of a disulfide bond with  
422 a ribosomal protein, or within the nascent chain itself. However, no  
423 crosslinked product is apparent when a gel is run under non-reducing  
424 conditions, Figure S7A, and  $f_{FL}$  is even slightly reduced (as expected from  
425 Figure 6C) when the other Cys residue in the AP (C247) is mutated to Ser,  
426 Figure S7B.

## 427 **Discussion**

428 While a growing number of bacterial APs have been identified, the only  
429 reasonably well-characterized mammalian arrest peptide is XBP1u, part of the  
430 central regulator in the UPR. We have determined the first high-resolution

431 structure of a mammalian AP stalled in the ribosome exit tunnel and have  
432 carried out an extensive mutagenesis analysis, providing insights into its  
433 mode of action.

434 As with previously described APs, XBP1u functions in a unique manner. The  
435 XBP1u AP forms a turn within the uppermost part of the tunnel to distort the  
436 PTC, inhibiting translational activity. The nascent chain is stabilized within the  
437 tunnel and positions the C-terminal region such that the closed conformation  
438 of C4398 (C2452) is induced, which is usually adopted only after A-site tRNA  
439 accommodation. Together with Leu259, the penultimate amino-acid of the  
440 paused nascent chain, this prevents proper accommodation of incoming Asn-  
441 tRNA, thereby explaining translational pausing (Figure 7).

442 Surprisingly, we show by mutagenesis that the residues constituting the turn  
443 in XBP1u have not evolved to maximize ribosome stalling, but rather appear  
444 to be selected for an intermediate level of translational arrest potency. P254  
445 plays a critical role in this regard, since nine other residues in this position can  
446 all impart stronger arrest potency on the AP. Stronger versions of the XBP1u  
447 APs can be useful as force sensors to study cotranslational processes such  
448 as membrane-protein insertion into the ER.

449 We also show that the mildly hydrophobic HR2 segment of XBP1u is  
450 recognized as a canonical signal sequence by SRP, with clear density visible  
451 in the SRP54 M-domain. However, HR2 cannot engage productively with the  
452 Sec61 translocon as a signal sequence, which is consistent with a previous  
453 report of minimal membrane insertion observed for XBP1u HR2 (Plumb et al.,  
454 2015; Kanda et al., 2016). Finally, we observed that the nascent chain  
455 conformation is unaltered within the tunnel in three distinct stages of ER



464 targeting of the ribosome-XBP1u complex: during ribosomal pausing, after  
465 recruitment of SRP and upon interaction with Sec61 translocon.

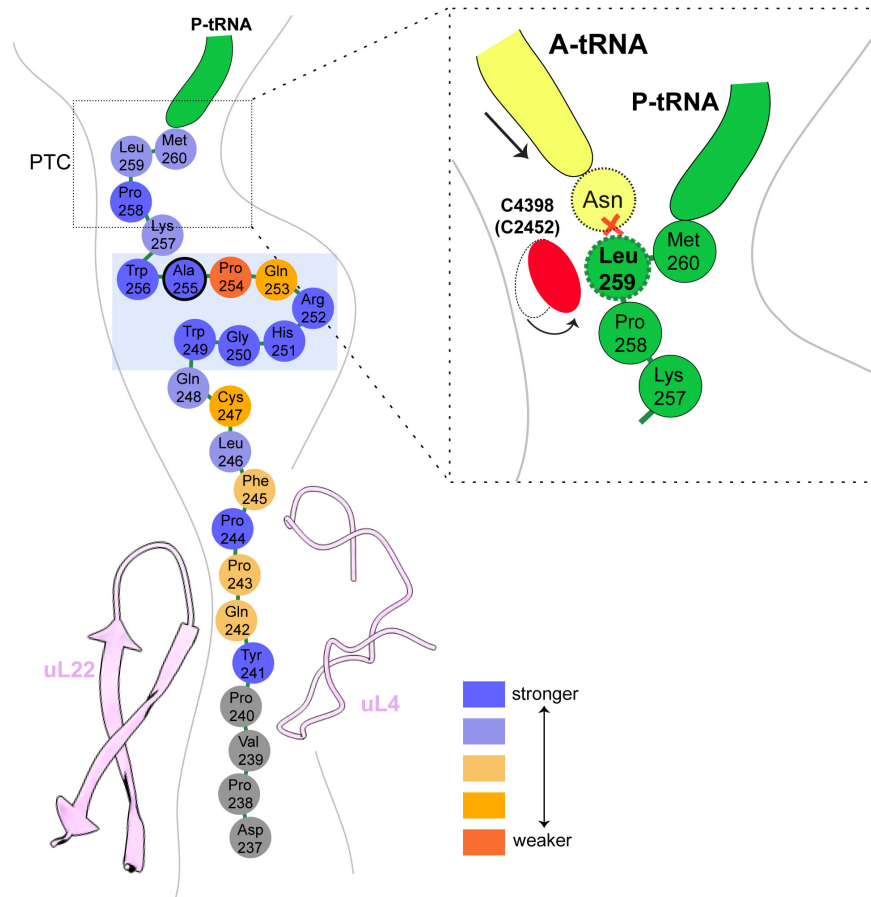

466

### Figure 7. Schematic representation of the XBP1u pausing motif in the exit tunnel

XBP1u residues color coded for pausing potency based on mutagenesis data. Turn formed by XBP1u is highlighted by a light blue box. Inset shows a schematic model of the PTC summarizing the pausing mechanism.

467

468 Based on our findings, we propose a structural and mechanistic explanation  
469 of XBP1u's role in the UPR. The XBP1u AP interaction with the ribosomal  
470 tunnel pauses ribosomes sufficiently as for the mildly hydrophobic HR2  
471 domain to gain competence for SRP recruitment. The recruitment of SRP

472 ensures proper co-translational targeting, and subsequent localization of the  
473 XBP1u mRNA, to the Sec61 translocon on the ER membrane, ensuring  
474 efficient cleavage of the *XBP1u* mRNA by IRE1 $\alpha$ . The observed unaltered  
475 states of the XBP1u nascent chain within the ribosomal tunnel suggest that  
476 neither SRP nor Sec61 release the translation stall induced by the XBP1u AP.  
477 This is consistent with the previous finding that HR2 is not hydrophobic  
478 enough for efficient membrane insertion (Kanda et al., 2016; Plumb et al.,  
479 2015). Independently of the nature of this interaction, however, the linker  
480 length between the pausing site and the beginning of the HR2 region of  
481 XBP1u may also be responsible for uncoupling of HR2 interactions from  
482 arrest peptide conformation. From our force profile analysis, the maximal  
483 accumulation of full-length product (i.e. maximal force) occurred at a linker  
484 length of 43 amino acids, whereas in stalled XBP1u HR2 is around 52 amino  
485 acids distant from the PTC, and hence will not exert significant pulling force  
486 even if inserted into the ER membrane.

487 If XBP1u-induced pausing is not released by force, we rather envision two  
488 alternative scenarios regarding the fate of the properly targeted, paused  
489 complex. First, the pausing may resolve autonomously with the given short  
490 half-life or, second, the paused complex is recognized by the Pelota/Hbs1  
491 surveillance system as shown in yeast and recycled. The former is more likely  
492 *in vivo*, since the wildtype XBP1u is even weaker than the somewhat stronger  
493 mutant (S255A) used in this study. In addition, it has also been shown  
494 biochemically that the pause is released when incubated longer during *in vitro*  
495 translations (Yanagitani et al., 2011).

496 In conclusion, the pausing of XBP1u might have evolved as a precise timer,  
497 which can pause ribosomes temporarily in order to allow co-translational  
498 localization of its polysome-carrying mRNA on the ER membrane for efficient  
499 splicing by Ire1 $\alpha$ . Interestingly, the mild pausing phenotype is induced by a  
500 tight turn of the AP within the exit tunnel, and mirrored by a rather minimal  
501 perturbation of the PTC through re-positioning of just one nucleotide, C4398.

502

### 503 **Acknowledgements**

504 This work was supported by grants from the Knut and Alice Wallenberg  
505 Foundation (2012.0282), the Swedish Research Council (621-2014-3713),  
506 and the Swedish Cancer Foundation (15 0888) to G.v.H., and JSPS  
507 KAKENHI JP24228002 to K.K. V.S. was supported by a DFG fellowship  
508 through the QBM (Quantitative Biosciences Munich) graduate school. This  
509 work was supported by the German Research Council (GRK1721 to R.B.).  
510 We also acknowledge the support of a Ph.D. fellowship from the Boehringer  
511 Ingelheim Fonds (to K.B.)

### 512 **Declaration of Interests**

513 All authors declare no competing interests.

514

## 515 **References**

- 516 Adams PD, Afonine P V., Bunkóczi G, Chen VB, Davis IW, Echols N, Headd  
517 JJ, Hung LW, Kapral GJ, Grosse-Kunstleve RW, McCoy AJ, Moriarty  
518 NW, Oeffner R, Read RJ, Richardson DC, Richardson JS, Terwilliger TC,  
519 Zwart PH. 2010. PHENIX: A comprehensive Python-based system for  
520 macromolecular structure solution. *Acta Crystallogr Sect D Biol*  
521 *Crystallogr* **66**:213–221. doi:10.1107/S0907444909052925
- 522 Aragón T, van Anken E, Pincus D, Serafimova IM, Korennykh A V, Rubio CA,  
523 Walter P. 2009. Messenger RNA targeting to endoplasmic reticulum  
524 stress signalling sites. *Nature* **457**:736–740.
- 525 B.Martoglio, S.Hauser BD. 1998. Cotranslational translocation of proteins into  
526 microsomes derived from the rough endoplasmic reticulum of mammalian  
527 cells. *Cell Biol A Lab Handb* 265–273.
- 528 Behrmann E, Loerke J, Budkevich T V., Yamamoto K, Schmidt A, Penczek  
529 PA, Vos MR, Bürger J, Mielke T, Scheerer P, Spahn CMT. 2015.  
530 Structural snapshots of actively translating human ribosomes. *Cell*  
531 **161**:845–857. doi:10.1016/j.cell.2015.03.052
- 532 Bertolotti A, Zhang Y, Hendershot LM, Harding HP, Ron D. 2000. Dynamic  
533 interaction of BiP and ER stress transducers in the unfolded-protein  
534 response. *Nat Cell Biol* **2**:326–332.
- 535 Braunger K, Pfeffer S, Shrimal S, Gilmore R, Berninghausen O, Mandon EC,  
536 Becker T, Förster F, Beckmann R. 2018. Structural basis for coupling  
537 protein transport and N-glycosylation at the mammalian endoplasmic  
538 reticulum. *Science* **360**:215–219. doi:10.1126/science.aar7899

- 539 Calfon M, Zeng H, Urano F, Till JH, Hubbard SR, Harding HP, Clark SG, Ron  
540 D. 2002. IRE1 couples endoplasmic reticulum load to secretory capacity  
541 by processing the XBP-1 mRNA. *Nature* **415**:92–96.  
542 doi:10.1038/415092a
- 543 Chen VB, Arendall WB, Headd JJ, Keedy DA, Immormino RM, Kapral GJ,  
544 Murray LW, Richardson JS, Richardson DC. 2010. MolProbity: All-atom  
545 structure validation for macromolecular crystallography. *Acta Crystallogr*  
546 *Sect D Biol Crystallogr* **66**:12–21. doi:10.1107/S0907444909042073
- 547 Credle JJ, Finer-Moore JS, Papa FR, Stroud RM, Walter P. 2005. On the  
548 mechanism of sensing unfolded protein in the endoplasmic reticulum.  
549 *Proc Natl Acad Sci U S A* **102**:18773–18784.  
550 doi:10.1073/pnas.0509487102
- 551 Emsley P, Cowtan K. 2004. Coot: Model-building tools for molecular graphics.  
552 *Acta Crystallogr Sect D Biol Crystallogr* **60**:2126–2132.  
553 doi:10.1107/S0907444904019158
- 554 Fagone P, Jackowski S. 2009. Membrane phospholipid synthesis and  
555 endoplasmic reticulum function. *J Lipid Res* **50**:S311–S316.  
556 doi:10.1194/jlr.R800049-JLR200
- 557 Gardner BM, Walter P. 2011. Unfolded Proteins Are Ire1-Activating Ligands  
558 That Directly Induce the Unfolded Protein Response. *Science* **333**:1891–  
559 1894. doi:10.1126/science.1209126
- 560 Gogala M, Becker T, Beatrix B, Armache J-P, Barrio-Garcia C,  
561 Berninghausen O, Beckmann R. 2014. Structures of the Sec61 complex  
562 engaged in nascent peptide translocation or membrane insertion. *Nature*

- 563        **506**:107–10. doi:10.1038/nature12950
- 564    Görlach A, Klappa P, Kietzmann DT. 2006. The Endoplasmic Reticulum:  
565        Folding, Calcium Homeostasis, Signaling, and Redox Control. *Antioxid*  
566        *Redox Signal* **8**:1391–1418. doi:10.1089/ars.2006.8.1391
- 567    Grootjans J, Kaser A, Kaufman RJ, Blumberg RS. 2016. The unfolded protein  
568        response in immunity and inflammation. *Nat Rev Immunol* **16**:469–484.
- 569    Hansen JL, Moore PB, Steitz TA. 2003. Structures of five antibiotics bound at  
570        the peptidyl transferase center of the large ribosomal subunit. *J Mol Biol*  
571        **330**:1061–1075. doi:10.1016/S0022-2836(03)00668-5
- 572    Hollien, Julie and Weissman JS. 2006. Decay of Endoplasmic Reticulum-  
573        Localized mRNAs During the Unfolded Protein Response. *Science* **313**:  
574        104–107. doi:10.1080/07373937.2010.483029
- 575    Hollien J, Lin JH, Li H, Stevens N, Walter P, Weissman JS. 2009. Regulated  
576        Ire1-dependent decay of messenger RNAs in mammalian cells. *J Cell*  
577        *Biol* **186**:323–331. doi:10.1083/jcb.200903014
- 578    Ingolia NT, Lareau L, Weissman J. 2011. Ribosome Profiling of Mouse  
579        Embryonic Stem Cells Reveals Complexity of Mammalian Proteomes.  
580        *Cell* **147**:789–802. doi:10.1016/j.cell.2011.10.002.Ribosome
- 581    Ismail N, Hedman R, Schiller N, von Heijne G. 2012. A biphasic pulling force  
582        acts on transmembrane helices during translocon-mediated membrane  
583        integration. *Nat Struct Mol Biol* **19**:1018–1022. doi:10.1038/nsmb.2376
- 584    Kanda S, Yanagitani K, Yokota Y, Esaki Y, Kohno K. 2016. Autonomous  
585        translational pausing is required for XBP1u mRNA recruitment to the ER  
586        via the SRP pathway. *Proc Natl Acad Sci U S A* **113**:E5886–E5895.

- 587        doi:10.1073/pnas.1604435113
- 588    Kimanius D, Forsberg BO, Scheres SHW, Lindahl E. 2016. Accelerated cryo-  
589        EM structure determination with parallelisation using GPUs in RELION-2.  
590        *Elife* **5**:1–21. doi:10.7554/eLife.18722
- 591    Kimata Y, Ishiwata-Kimata Y, Ito T, Hirata A, Suzuki T, Oikawa D, Takeuchi  
592        M, Kohno K. 2007. Two regulatory steps of ER-stress sensor Ire1  
593        involving its cluster formation and interaction with unfolded proteins. *J*  
594        *Cell Biol* **179**:75–86. doi:10.1083/jcb.200704166
- 595    Kohno K. 2010. Stress-sensing mechanisms in the unfolded protein response:  
596        similarities and differences between yeast and mammals. *J Biochem*  
597        **147**:27–33.
- 598    Korennykh A V., Egea PF, Korostelev AA, Finer-Moore J, Zhang C, Shokat  
599        KM, Stroud RM, Walter P. 2009. The unfolded protein response signals  
600        through high-order assembly of Ire1. *Nature* **457**:687–693.  
601        doi:10.1038/nature07661
- 602    Li H, Korennykh A V, Behrman SL, Walter P. 2010. Mammalian endoplasmic  
603        reticulum stress sensor IRE1 signals by dynamic clustering. *Proc Natl*  
604        *Acad Sci* **107**:16113–16118. doi:10.1073/pnas.1010580107
- 605    Martin Schmeing T, Huang KS, Strobel SA, Steitz TA. 2005. An induced-fit  
606        mechanism to promote peptide bond formation and exclude hydrolysis of  
607        peptidyl-tRNA. *Nature* **438**:520–524. doi:10.1038/nature04152
- 608    Matheisl S, Berninghausen O, Becker T, Beckmann R. 2015. Structure of a  
609        human translation termination complex. *Nucleic Acids Res* **43**:8615–  
610        8626. doi:10.1093/nar/gkv909

- 611 Mori K. 2009. Signalling pathways in the unfolded protein response:  
612 Development from yeast to mammals. *J Biochem* **146**:743–750.  
613 doi:10.1093/jb/mvp166
- 614 Nilsson OB, Nickson AA, Hollins JJ, Wickles S, Steward A, Beckmann R, Von  
615 Heijne G, Clarke J. 2017. Cotranslational folding of spectrin domains via  
616 partially structured states. *Nat Struct Mol Biol* **24**:221–225.  
617 doi:10.1038/nsmb.3355
- 618 Okamura K, Kimata Y, Higashio H, Tsuru A, Kohno K. 2000. Dissociation of  
619 Kar2p/BiP from an ER Sensory Molecule, Ire1p, Triggers the Unfolded  
620 Protein Response in Yeast. *Biochem Biophys Res Commun* **279**:445–  
621 450. doi:<https://doi.org/10.1006/bbrc.2000.3987>
- 622 Pettersen EF, Goddard TD, Huang CC, Couch GS, Greenblatt DM, Meng EC,  
623 Ferrin TE. 2004. UCSF Chimera - A visualization system for exploratory  
624 research and analysis. *J Comput Chem* **25**:1605–1612.  
625 doi:10.1002/jcc.20084
- 626 Plumb R, Zhang ZR, Appathurai S, Mariappan M. 2015. A functional link  
627 between the co-translational protein translocation pathway and the UPR.  
628 *Elife* **4**:2–27. doi:10.7554/eLife.07426
- 629 Schmidt C, Becker T, Heuer A, Braunger K, Shanmuganathan V, Pech M,  
630 Berninghausen O, Wilson DN, Beckmann R. 2015. Structure of the  
631 hypusinylated eukaryotic translation factor eIF-5A bound to the ribosome.  
632 *Nucleic Acids Res* **44**:1944–1951. doi:10.1093/nar/gkv1517
- 633 Shaffer AL, Shapiro-Shelef M, Iwakoshi NN, Lee A-H, Qian S-B, Zhao H, Yu  
634 X, Yang L, Tan BK, Rosenwald A, Hurt EM, Petroulakis E, Sonenberg N,



- 635 Yewdell JW, Calame K, Glimcher LH, Staudt LM. 2004. XBP1,  
636 Downstream of Blimp-1, Expands the Secretory Apparatus and Other  
637 Organelles, and Increases Protein Synthesis in Plasma Cell  
638 Differentiation. *Immunity* **21**:81–93. doi:10.1016/j.immuni.2004.06.010
- 639 Shao S, Murray J, Brown A, Taunton J, Ramakrishnan V, Hegde RS. 2016.  
640 Decoding Mammalian Ribosome-mRNA States by Translational GTPase  
641 Complexes. *Cell* **167**:1229–1240.e15. doi:10.1016/j.cell.2016.10.046
- 642 Sohmen D, Chiba S, Shimokawa-Chiba N, Innis CA, Berninghausen O,  
643 Beckmann R, Ito K, Wilson DN. 2015. Structure of the Bacillus subtilis  
644 70S ribosome reveals the basis for species-specific stalling. *Nat Commun*  
645 **6**:6941. doi:10.1038/ncomms7941
- 646 Sriburi R, Jackowski S, Mori K, Brewer JW. 2004. XBP1. *J Cell Biol* **167**:35–  
647 41. doi:10.1083/jcb.200406136
- 648 Su T, Cheng J, Sohmen D, Hedman R, Berninghausen O, von Heijne G,  
649 Wilson DN, Beckmann R. 2017. The force-sensing peptide VemP  
650 employs extreme compaction and secondary structure formation to  
651 induce ribosomal stalling. *Elife* **6**:1–17. doi:10.7554/eLife.25642
- 652 Svidritskiy E, Brilot AF, Koh CS, Grigorieff N, Korostelev AA. 2014. Structures  
653 of yeast 80S ribosome-tRNA complexes in the rotated and nonrotated  
654 conformations. *Structure* **22**:1210–1218. doi:10.1016/j.str.2014.06.003
- 655 Voorhees RM, Hegde RS. 2015. Structures of the scanning and engaged  
656 states of the mammalian SRP-ribosome complex. *Elife* **4**:1–21.  
657 doi:10.7554/eLife.07975
- 658 Walter P, Blobel G. 1983. Disassembly and reconstitution of signal recognition

- 659           particle. *Cell* **34**:525–533. doi:10.1016/0092-8674(83)90385-9
- 660   Walter P, Ron D. 2011. The Unfolded Protein Response: From Stress  
661           Pathway to Homeostatic Regulation. *Science* **334**:1081–1086.  
662           doi:10.1126/science.1209038
- 663   Wilson DN. 2009. The A-Z of bacterial translation inhibitors. *Crit Rev Biochem*  
664           *Mol Biol* **44**:393–433. doi:10.3109/10409230903307311
- 665   Yanagitani K, Imagawa Y, Iwawaki T, Hosoda A, Saito M, Kimata Y, Kohno K.  
666           2009. Cotranslational Targeting of XBP1 Protein to the Membrane  
667           Promotes Cytoplasmic Splicing of Its Own mRNA. *Mol Cell* **34**:191–200.  
668           doi:10.1016/j.molcel.2009.02.033
- 669   Yanagitani K, Kimata Y, Kadokura H, Kohno K. 2011. Translational pausing  
670           ensures membrane targeting and cytoplasmic splicing of XBP1u mRNA.  
671           *Science* **331**:586–589. doi:10.1126/science.1197142
- 672   Yoshida H, Matsui T, Yamamoto A, Okada T, Mori K. 2001. XBP1 mRNA Is  
673           Induced by ATF6 and Spliced by IRE1 in Response to ER Stress to  
674           Produce a Highly Active Transcription Factor. *Cell* **107**:881–891.
- 675   Zhang J, Pan X, Yan K, Sun S, Gao N, Sui SF. 2015. Mechanisms of  
676           ribosome stalling by SecM at multiple elongation steps. *Elife* **4**:1–25.  
677           doi:10.7554/eLife.09684.001
- 678
- 679

## 680 **Materials and methods**

### 681 **Cloning of mutant *XBP1u***

682 Original full length XBP1u constructs were from the lab of Dr. Kenji Kohno  
683 (Nara Institute of Science and Technology, Nara, Japan). The mutant (S255A)  
684 full length construct (XBP1u-del-HR1-mu) was then truncated to have only the  
685 HR2 domain and pausing motif with N-terminal (8X-His, 3X-Flag and 3C  
686 protease cleavage site) and C-terminal (HA-tag) for affinity purification and  
687 detection purposes. The final sequence of the construct used for purification:

688 MGHHHHHHHHGSDYKDHDGDYKDHDIDYKDDDDKDYDIPTTLEVLFFQGGP  
689 GSISPWILAVLTLQIQLISCWAFWTTWTQSCSSNALPQSLPAWRSSQRSTQ  
690 KDPVPYQPPFLCQWGRHQPAWKPLMNYPYDVPDYAGS\*

### 691 ***In vitro* transcription**

692 The plasmid containing the construct was linearized with Not-I HF enzyme  
693 (NEB) at 37°C for 2 h. mRNA for *invitro* translation was prepared using the  
694 mMessage mMachine™ T7 Kit (Invitrogen) with linearized plasmid as the  
695 template. Capped mRNA was generated following the recommended  
696 procedures of the kit. mRNA was then extracted from the reaction mixture  
697 using lithium chloride (LiCl) precipitation.

### 698 **Rabbit reticulocyte lysate *in vitro* translation**

699 Untreated crude reticulocyte lysate was purchased from Green Hectares  
700 (USA), which was then treated with Hemin and MNase, and stored at -80°C.  
701 For a 200 µl translation reaction, the 140 µl of treated lysate was used and  
702 further supplemented with 3 mM Creatine Phosphate, 30 µM yeast tRNA, 60  
703 mM KOAc, 300 µM Mg(OAc)<sub>2</sub>, 30 µM of amino-acid mixture (Promega) and  
704 0.35 U/µl of RNase inhibitor (SUPERase<sup>™</sup> In™, Invitrogen). 80 ng of mRNA per

705  $\mu$ l of reaction volume was used for subsequent affinity purification of final  
706 XBP1u-RNC preparation.

#### 707 **Purification of XBP1u- ribosome nascent chain complex (XBP1u-RNC)**

708 mRNA was linearized by heating at 65°C for 3 min, before adding it to the  
709 translation mixture. 800  $\mu$ l translation reaction mix was setup and translation  
710 was initiated with the addition of capped mRNA. Translation reaction was then  
711 incubated in 200  $\mu$ l aliquots for 10 min at 37°C. Reactions were then stopped  
712 by cooling on ice, and then diluted to 2.4 ml with ice-cold buffer A (50 mM  
713 HEPES/KOH pH 7.5, 200 mM KOAc, 15 mM Mg(OAc)<sub>2</sub>, 1 mM DTT, 0.1%  
714 Nikkol and 0.02 U/ $\mu$ l of RNase inhibitor). Diluted reaction mix was then  
715 incubated with beads at 4°C for 120 min with rotation. After incubation, beads  
716 were washed multiple times with buffer A with two intermediate washing steps  
717 with buffer A (supplemented with 10 mM imidazole). For elution of the XBP1u-  
718 ribosome nascent chain complex, the beads are then incubated with 3C  
719 protease (in buffer A) overnight at 4°C with rotation. Flow-through containing  
720 XBP1u-RNC were collected, and then centrifuged at 14,000 rpm for 10 min at  
721 4°C to remove any large aggregates. Supernatant from this step was pelleted  
722 through 500 mM sucrose (in buffer A) cushion using TLA100.3 rotor at 90,000  
723 rpm for 90 min at 4°C. The preparation yielded 4.2 pmol of XBP1u-RNC which  
724 was then used to make cryo-EM grid.

#### 725 ***In vitro* reconstitution of purified XBP1u-RNC with SRP and Sec61**

726 SRP was purified from a high salt extract of canine rough microsomes by gel  
727 filtration (Sephadex G-150), followed by ion-exchange chromatography  
728 (DEAE-Sepharose) as described before (B.Martoglio, S.Hauser, 1998). SRP

729 was then further purified by sucrose centrifugation as described before  
730 (Walter and Blobel, 1983). XBP1u-RNC-SRP sample is prepared as follows:  
731 1.2X molar excess of purified dog SRP was added to purified XBP1u-RNC in  
732 the presence of 2 mM GMP-PNP and 0.01% GDN, and incubated at 25°C for  
733 15 min. Additional 4.5X excess of purified SRP receptor ( $\alpha$  and  $\beta$ ) and six-fold  
734 excess of Sec61 was added and incubated at 25°C for 15 min before being  
735 applied onto the grids for cryo-EM analysis.

736 Canine puromycin/high-salt treated rough membranes (PKRM) were prepared  
737 as described before (Gogala et al., 2014). PKRM was pre-treated with  
738 RNAsin, and were incubated with purified XBP1u-RNC for 15 min at 25 °C.  
739 Membranes were then solubilized with 1.5% digitonin in Buffer A for 90 min in  
740 ice. Solubilized ribosome-translocon complexes were pelleted through  
741 sucrose cushion (with 500 mM sucrose, 0.3% digitonin, PMSF and protease  
742 inhibitor in buffer A). Pelleted complexes were resuspended in buffer A with  
743 0.1% GDN and used for cryo-EM sample preparation.

#### 744 **Cryo-electron microscopy and single particle reconstruction**

745 XBP1u-RNC (5.2 OD<sub>260</sub>/mL) was applied to 2 nm pre-coated Quantifoil R3/3  
746 grids. Cryo-EM data was collected semi-automatically using EM-TOOLS  
747 acquisition software (TVIPS, Germany) on a Titan Krios TEM at a defocus  
748 range between 0.5 and 3  $\mu$ m. All data were recorded on a Falcon II detector  
749 (FEI) with a nominal pixel size of 1.084 Å/pixel on the object scale. A total of  
750 6080 micrographs were collected with a total exposure of ~28 electrons/ Å<sup>2</sup>  
751 fractionated into 10 frames. All micrographs were manually inspected for ice  
752 and aggregation, and then subjected to automated particle picking with  
753 Gautomatch (<https://www.mrc-lmb.cam.ac.uk/kzhang/>). All classifications and

754 refinements were performed using Relion-2.1 (Kimanius et al). Total of  
755 531,952 ribosomal particles after 2D classification were subjected 3D  
756 classification with a prior round of 3D refinement. Initial 3D classification had  
757 two ribosomal states (post and rotated) with tRNA's. In order to further enrich  
758 the post state complex, further 3D classification was done with a mask for P-  
759 tRNA and 60S, and the resulting sub-sorted class with 223,773 particles were  
760 refined with a masked 60S leading to final resolution of 3 Å. The rotated state  
761 from the initial 3D classification with 94,923 particles was also refined with a  
762 60S mask to 3.1 Å overall resolution.

763 A total of 10,136 micrographs were collected for XBP1u-RNC-SRP dataset  
764 and 6,668 were finally subjected to automated particle picking, and further  
765 processed as mentioned above. The final sub-sorted class of post state-RNC  
766 with SRP was refined with a mask for 60S and SRP.

### 767 **Molecular modeling and refinement of the XBP1u-RNC**

768 For the post state XBP1u-RNC, pdb 5LZV (Shao et al., 2016) was used as the  
769 initial 80S molecular model of the rabbit 80S ribosome to dock into the  
770 sharpened density. The initial fit was done with UCSF Chimera (Pettersen et  
771 al., 2004), the model was further adjusted manually in Coot (Emsley and  
772 Cowtan, 2004) and refined using phenix.real-space\_refine (Adams et al.,  
773 2010) with restraints obtained with the command  
774 phenix.secondary\_structure\_restraints. All manual adjustments for the final  
775 model were done to fit into corresponding local resolution filtered map  
776 generated with Relion 2.1 (Kimanius et al., 2016). Following bases of the 28S  
777 rRNA were manually inspected and adjusted in Coot: C2794, G3904, A3908,

778 A4388, C4398, U4531 and U4532. P- and E- tRNA, mRNA was also  
779 inspected manually for proper fit into the density.

780 For the rotated state model, first the large subunit (60S) was fitted. For fitting  
781 the 40S, the 40S was split into two parts: the head and the body. Split small  
782 subunit models were fitted using Coot and then joined together. P/E- tRNA  
783 from the pdb 3J77 (Svidritskiy et al., 2014) and A/P- tRNA from pdb 3JBV  
784 (Zhang et al., 2015) were used as initial models in the rotated state.

785 Refinement for rotated state and XBP1u-RNC with SRP and Sec61 were  
786 performed as mentioned above. SRP and Sec61 models were rigid body  
787 docked and fitted in Coot, and initial models were from pdb 3JAJ (Voorhees  
788 and Hegde, 2015) and 6FTI (Braunger et al., 2018). Molprobit (Chen et al.,  
789 2010) was used to calculate the statistics (Table 1) of all the final refined  
790 models.

## 791 **Enzymes and chemicals**

792 Unless stated otherwise, all chemicals were from Sigma-Aldrich (St Louis,  
793 MO, USA). Oligonucleotides were purchased from MWG Biotech AG  
794 (Ebersberg, Germany). Pfu Turbo DNA polymerase was purchased from  
795 Agilent Technologies. All other enzymes were from Fermentas. The plasmid  
796 pGEM-1 and the TNT SP6 Transcription/Translation System were from  
797 Promega. [<sup>35</sup>S]Met was from PerkinElmer.

## 798 **Construction of mutant library**

799 Site-specific mutagenesis was performed using the QuikChange™ Site-  
800 Directed Mutagenesis Kit from Stratagene. All mutants were confirmed by  
801 sequencing of plasmid DNA at Eurofins MWG Operon (Ebersberg, Germany).

802 **Expression *in vitro***

803 Constructs cloned in pGEM-1 were transcribed and translated in the TNT  
804 Quick coupled transcription/translation system. 1 µg of DNA template, 1 µl of  
805 [<sup>35</sup>S]-Met (10 µCi; 1 Ci/437 GBq), 3 µl of zinc acetate dihydrate (5 µM) were  
806 mixed with 10 µl of TNT lysate mix, and samples were incubated for 30 min at  
807 30°C. The sample was mixed with 1 µl of RNase I (Affymetrix; 2 mg/ml) and  
808 SDS sample buffer and incubated at 30°C for 15 min before loading on a 10%  
809 SDS/polyacrylamide gel. Protein bands were visualized in a Fuji FLA-3000  
810 phosphoimager (Fujifilm, Tokyo, Japan). The Image Gauge V 4.23 software  
811 (Fujifilm) was used to generate a two-dimensional intensity profile of each gel  
812 lane, and the multi-Gaussian fit program from the Qtiplot software package  
813 ([www.qtiplot.ro](http://www.qtiplot.ro)) was used to calculate the peak areas of the protein bands.  
814 The fraction full-length protein ( $f_{FL}$ ) was calculated as  $f_{FL} = I_{FL}/(I_{FL} + I_A)$ , where  
815  $I_{FL}$  is the intensity of the band corresponding to the full-length protein, and  $I_A$  is  
816 the intensity of the band corresponding to the arrested form of the protein.  
817 Experiments were repeated three times, and SEMs were calculated.

818



823 **Supplementary Figures**

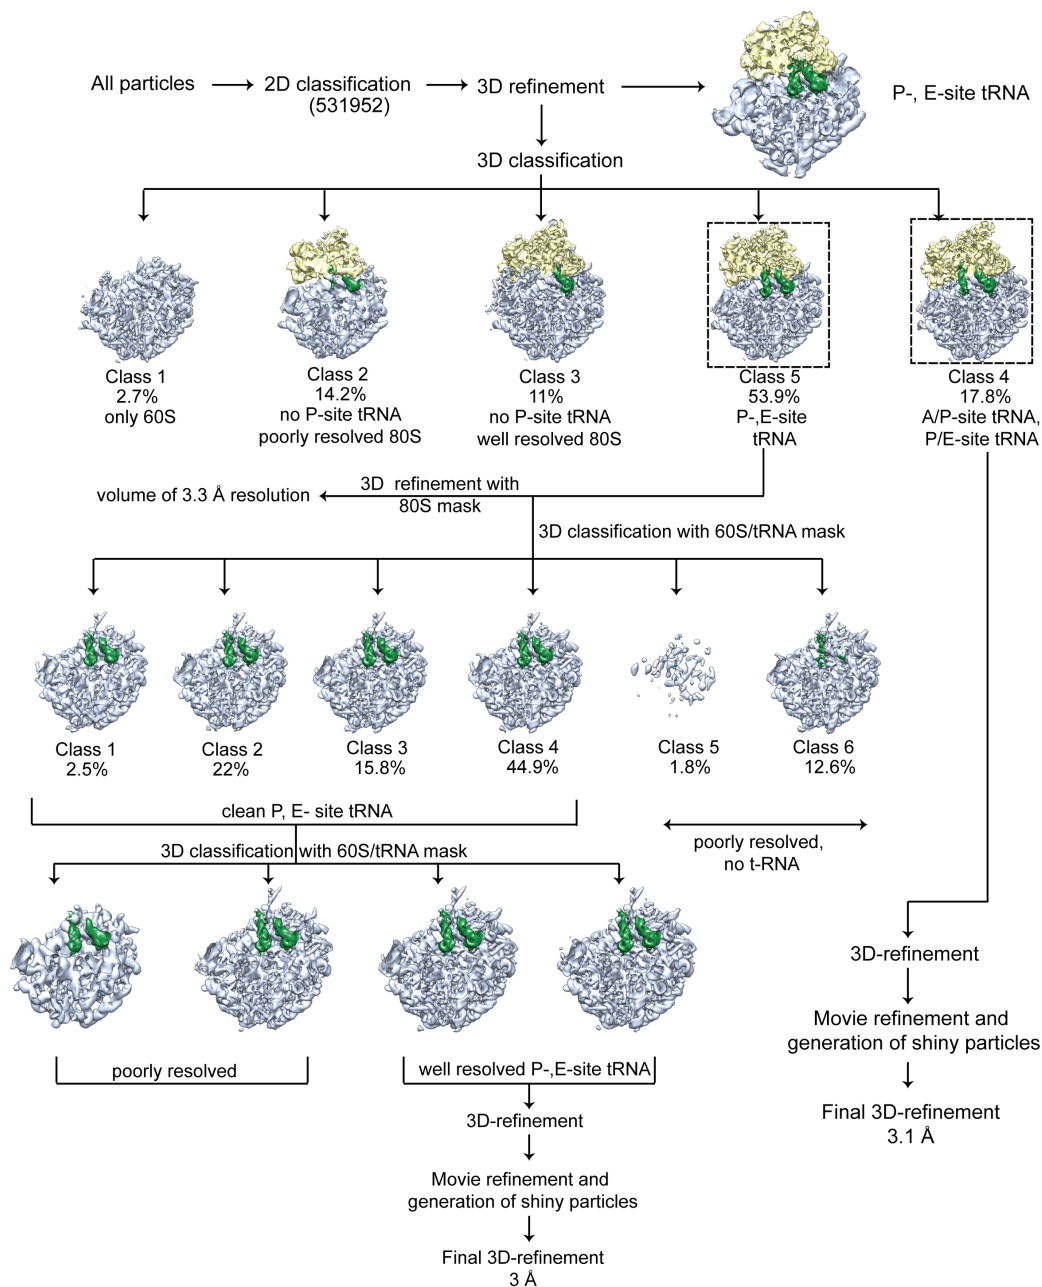

824

**Figure S1. Cryo-EM data processing of the XBP1u nascent chain stalled ribosomes.**

*In silico* sorting procedure of the data is shown in the schema. Intermediate densities are shown with 60S in blue, 40S in yellow and tRNAs in green. For details check experimental methods section for data processing.

825

826

**A** XBP1u-RNC (post state)

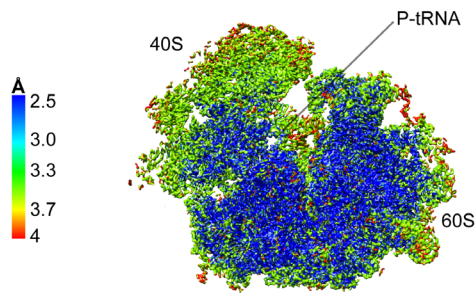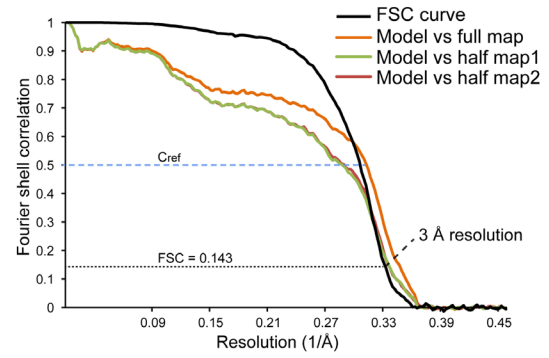

**B** XBP1u-RNC (rotated state)

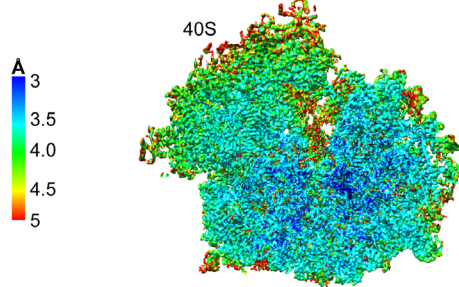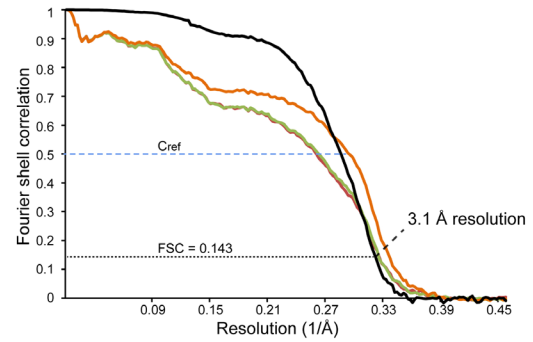

**C** XBP1u-RNC-SRP

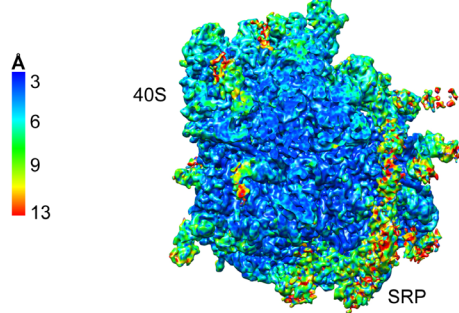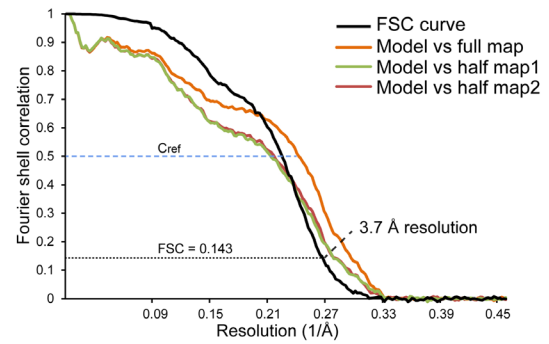

**D** XBP1u-RNC-Sec61

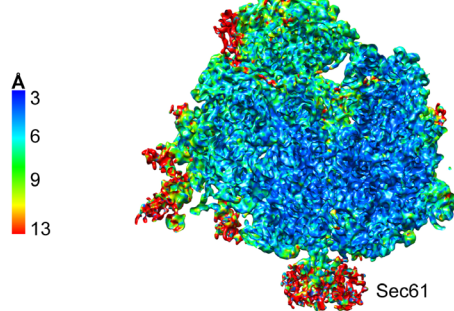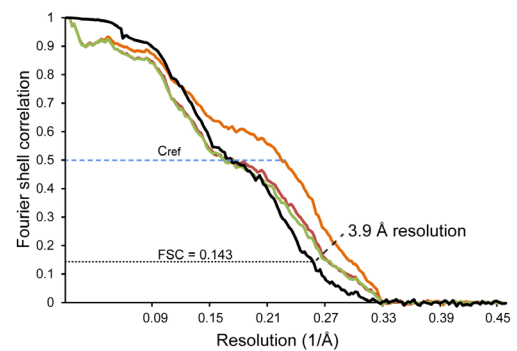

827

## Figure S2. Resolution of XBP1u-RNCs.

(Left panel) **(A-B)** Traverse section of post and rotated state of the XBP1u-RNC final map colored according to local resolution are shown here. Relion generated local resolution maps are used. **(C-D)** Electron density maps of XBP1u-RNC with SRP and Sec61 colored according to local resolution. Lowpass filtered maps at 6 Å are used in this figure. Right panel **(A-D)** Fourier shell correlation (black) curve of the final maps, indicating average resolutions (FSC=0.143, dashed black line). FSC curves calculated between final map and model (orange), as well as the self (green) and cross validated (brown) correlation curves for respective XBP1u-RNC states are plotted, indicating resolutions (FSC=0.5  $C_{ref}$ , dashed blue line).

828

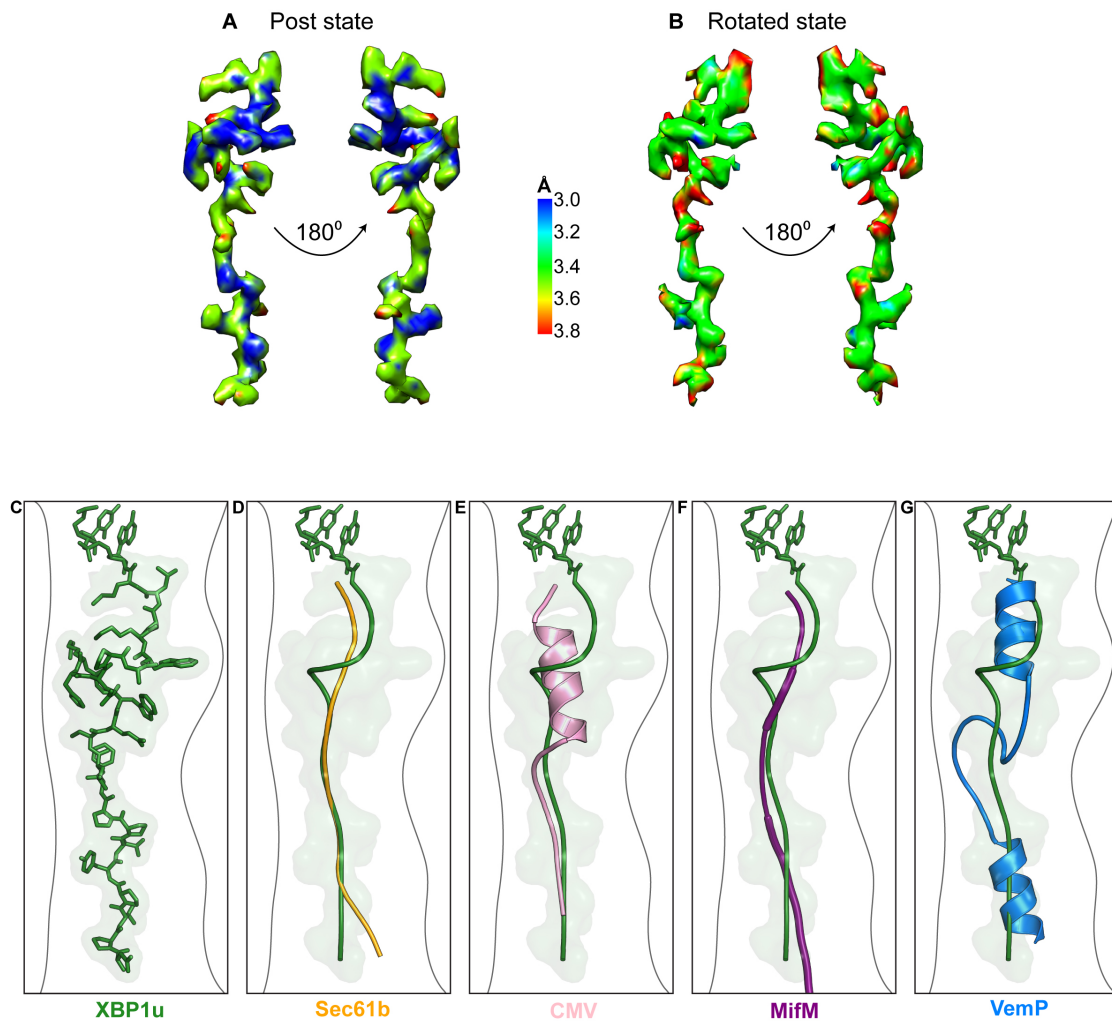

829  
830

**Figure S3. XBP1u nascent chain resolution in the ribosomal tunnel and comparison to other known stalling peptides.**

**(A-B)** Isolated XBP1u nascent chain density of the post and rotated state XBP1u-RNC colored by local resolution. **(C-G)** Superposition of XBP1u nascent chain (model in forest green, surface in light green) with Sec61b (orange, PDB ID 3JAG) (Voorhees and Hegde, 2015), hCMV (pink, PDB ID 5A8L) (Matheisl et al., 2015), MifM (purple, PDB ID 3J9W) (Sohmen et al., 2015) and VemP (blue, PDB ID 5NWY) (Su et al., 2017) respectively.

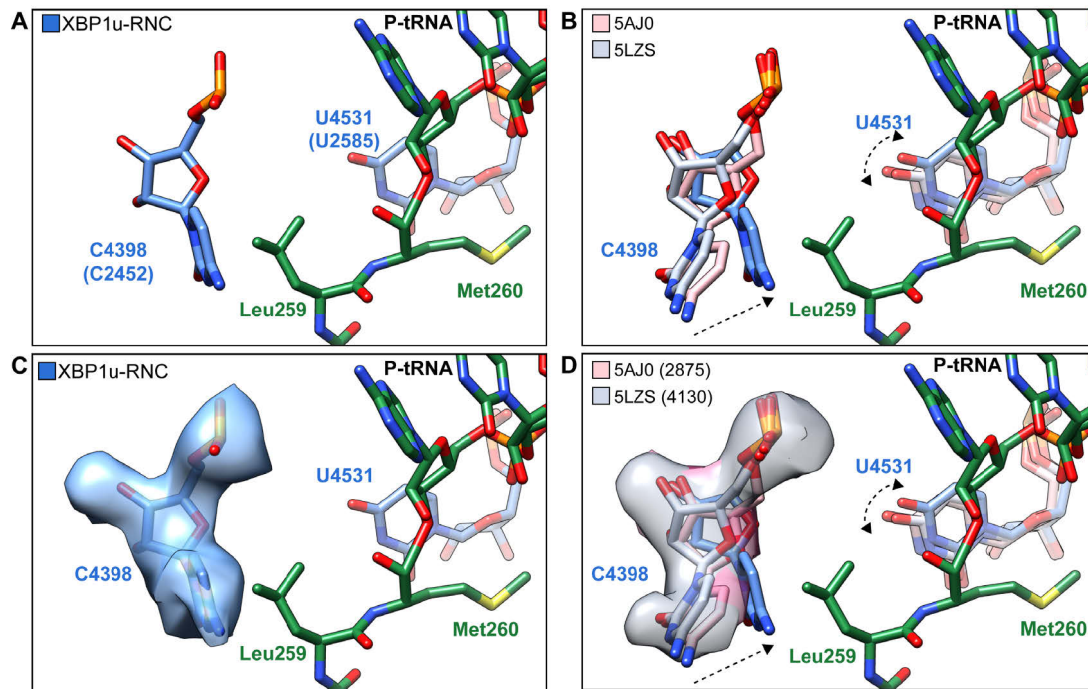

831

**Figure S4. Comparison of C4398(C2452) and U4531(U2585) conformation in XBP1u-RNC with other post-state ribosome 80S models.**

**(A)** State of the base C4398 and U4531 in XBP1u-RNC (blue). **(B)** State of C4398 and U4531 compared with post state 80S (PDB ID 5AJ0, softpink and 5LZS, softblue) without an accommodated A-site tRNA. **(C) - (D)** (A) and (B) displayed with isolated density for the base C4398 (XBP1u-RNC in blue, EMD ID 2875, softpink and 4130, softblue)

832

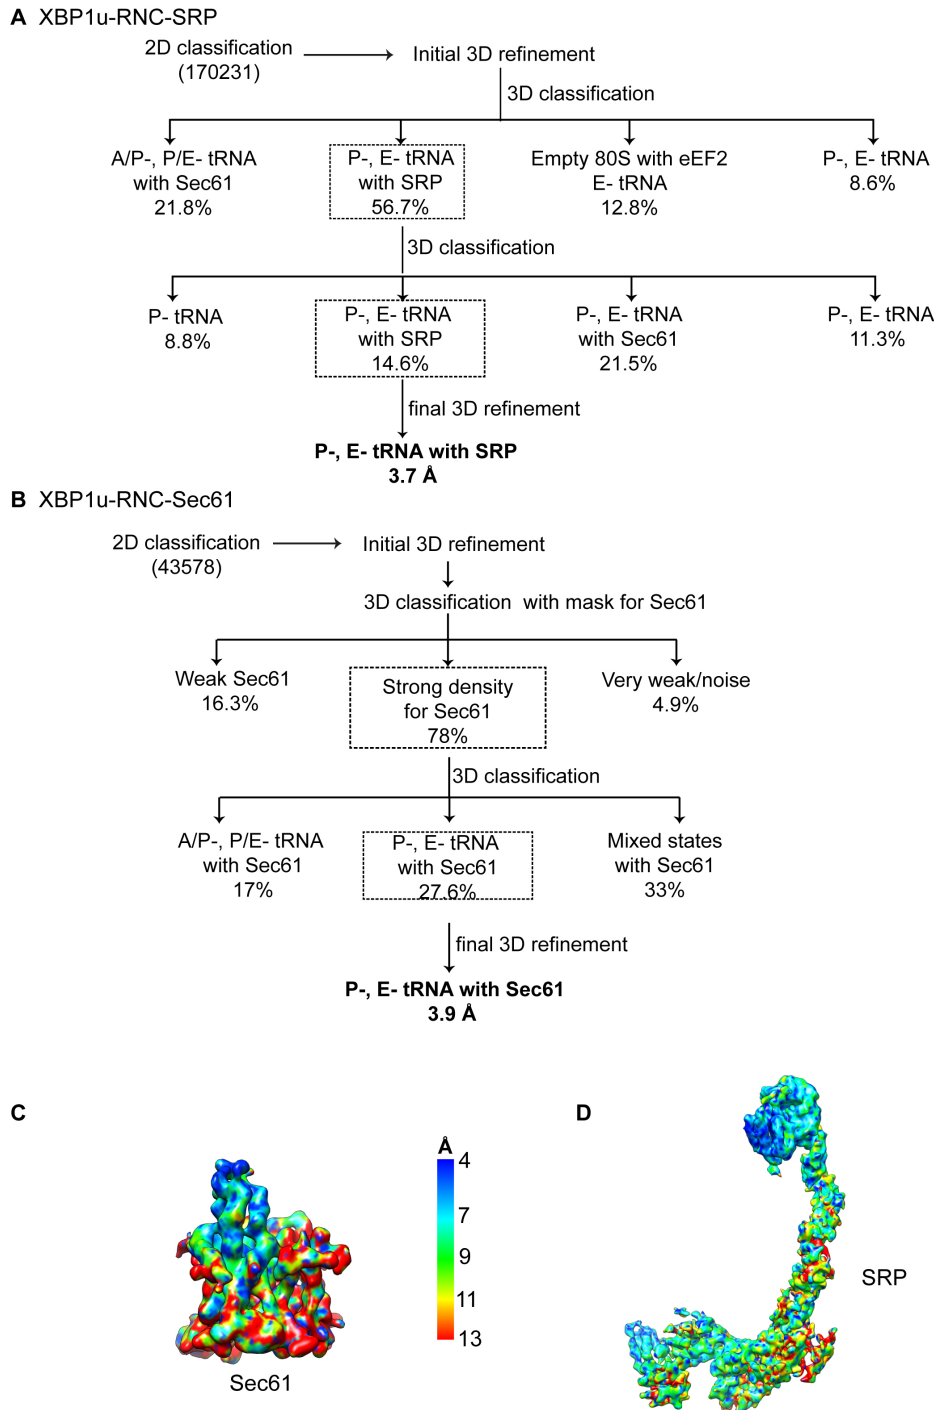

833

834

**Figure S5. *In silico* sorting and local resolution.**

**(A-B)** Cryo-EM data processing of XBP1u-RNC-SRP and XBP1u-RNC-Sec61. *In silico* sorting of both the datasets is schematically shown. **(C-D)** Isolated densities of Sec61 and SRP are colored according to their local resolution.

A = Isolation sequence, A = H-segment, A = 25-residue XBP1 arrest peptide, A = linker, A = N-glycosylation acceptor site.

Starting construct for mutagenesis scan:

MANMFALILVIATLVTGILWCVDKFFFPKRRERQAAAQAAAGDSLKDATLKKVAPKPGWLETGASVFPVL  
AIVLIVRSFIYEPFQIPSGSMMPNLNSTDFILVEKFAYGIKDPIYQKTLIETGHPKRGDIVVFKYPEDPKLDYIK  
RAVGLPGDKVTYDPVSKELTIQPGCSSGQACENALPVTYSNVEPSDFVQTFSTRNGGEATSGFFVEVPKQ  
ETKENGIRLSETS **GGPG**AAAALALALALALALAAAA**GGPG**FVPEANLVGRATAGDPVPYQPPFLCQWGR  
HQPAAWKPLMNGSSDKQEGEWPTGLRLSRIGGIH\*

Starting construct for second mutagenesis scan (P254V mutation):

MANMFALILVIATLVTGILWCVDKFFFPKRRERQAAAQAAAGDSLKDATLKKVAPKPGWLETGASVFPVLA  
IVLIVRSFIYEPFQIPSGSMMPNLNSTDFILVEKFAYGIKDPIYQKTLIETGHPKRGDIVVFKYPEDPKLDYIKRA  
VGLPGDKVTYDPVSKELTIQPGCSSGQACENALPVTYSNVEPSDFVQTFSTRNGGEATSGFFVEVPKQETK  
ENGIRLSETS **GGPG**AAAALALALALALALAAAA**GGPG**FVPEANLVGRATAGDPVPYQPPFLCQWGRHQA  
WKPLMNGSSDKQEGEWPTGLRLSRIGGIH\*

Full length control (L246A mutation):

MANMFALILVIATLVTGILWCVDKFFFPKRRERQAAAQAAAGDSLKDATLKKVAPKPGWLETGASVFPVLA  
IVLIVRSFIYEPFQIPSGSMMPNLNSTDFILVEKFAYGIKDPIYQKTLIETGHPKRGDIVVFKYPEDPKLDYIKRA  
GLPGDKVTYDPVSKELTIQPGCSSGQACENALPVTYSNVEPSDFVQTFSTRNGGEATSGFFVEVPKQETKE  
NGIRLSETS **GGPG**AAAALALALALALALAAAA**GGPG**FVPEANLVGRATAGDPVPYQPPFLCQWGRHQA  
KPLMNGSSDKQEGEWPTGLRLSRIGGIH\*

Arrest control:

MANMFALILVIATLVTGILWCVDKFFFPKRRERQAAAQAAAGDSLKDATLKKVAPKPGWLETGASVFPVLA  
IVLIVRSFIYEPFQIPSGSMMPNLNSTDFILVEKFAYGIKDPIYQKTLIETGHPKRGDIVVFKYPEDPKLDYIKRA  
GLPGDKVTYDPVSKELTIQPGCSSGQACENALPVTYSNVEPSDFVQTFSTRNGGEATSGFFVEVPKQETKE  
NGIRLSETS **GGPG**AAAALALALALALALAAAA**GGPG**FVPEANLVGRATAGDPVPYQPPFLCQWGRHQA  
PLMN\*SSDKQEGEWPTGLRLSRIGGIH\*

837

## Figure S6. LepB-XBP1u constructs.

Amino acid sequences of the LepB-XBP1u[L=43] constructs used in the mutagenesis scans.

838

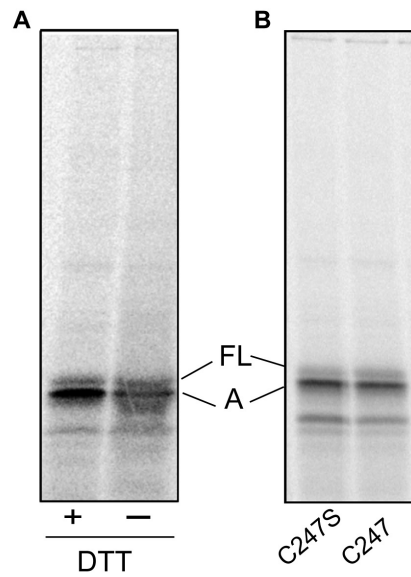

842

**Figure S7. Analysis of Cys positioning by cross-linking.**

**(A)** No high-Mw disulfide-bonded crosslinked product is seen when *in-vitro* translated LepB-XBP1u[P254C, S255A; L=43] construct is analyzed by non-reducing SDS-PAGE in the absence or presence of DTT. **(B)**  $f_{FL}$  is reduced slightly when C247 is mutated to S, from 0.27 for LepB-XBP1u[P254C, S255A; L=43] to 0.14 for LepB-XBP1u[C247S, P254C, S255A; L=43].

843  
844



840 **Supplementary Table 1. Cryo-EM data collection, refinement and**  
 841 **validation statistics**

|                                           | <b>XBP1-RNC</b> | <b>XBP1-RNC</b> | <b>XBP1-RNC-SRP</b> | <b>XBP1-RNC-Sec61</b> |
|-------------------------------------------|-----------------|-----------------|---------------------|-----------------------|
| Ribosomal state                           | Post State      | Rotated state   | Post state          | Post state            |
| Microscope                                | FEI Titan Krios | FEI Titan Krios | FEI Titan Krios     | FEI Titan Krios       |
| Camera                                    | Falcon II       | Falcon II       | Falcon II           | Falcon II             |
| Voltage (kV)                              | 300             | 300             | 300                 | 300                   |
| Pixel size (Å)                            | 1.084           | 1.084           | 1.084               | 1.084                 |
| Electron dose (e-/Å <sup>2</sup> )        | 28              | 28              | 28                  | 28                    |
| Defocus range (µm)                        | 0.5 - 2.5       | 0.5 - 2.5       | 0.5 - 2.5           | 0.5 - 2.5             |
| Particles after 2D (no.)                  | 531952          | 531952          | 170231              | 43578                 |
| Final particles (no.)                     | 223773          | 94923           | 24875               | 12749                 |
| <b>Model Composition</b>                  |                 |                 |                     |                       |
| Protein residues                          | 11717           | 11673           | 12566               | 12239                 |
| RNA bases                                 | 5669            | 5797            | 5874                | 5668                  |
| <b>Resolution (Å)</b>                     | 3               | 3.1             | 3.7                 | 3.9                   |
| FSC threshold                             | 0.143           | 0.143           | 0.143               | 0.143                 |
| Map CC (around atoms)                     | 0.76            | 0.75            | 0.71                | 0.68                  |
| Map CC (whole unit cell)                  | 0.73            | 0.72            | 0.68                | 0.66                  |
| Map sharpening B-factor (Å <sup>2</sup> ) | -71.2           | -59.9           | -105.54             | -81.6                 |
| <b>RMS Deviations</b>                     |                 |                 |                     |                       |
| Bond lengths (Å)                          | 0.004           | 0.0038          | 0.0036              | 0.0035                |
| Bond angles (°)                           | 0.91            | 0.92            | 0.88                | 0.91                  |
| <b>Validation</b>                         |                 |                 |                     |                       |
| MolProbity score                          | 1.5             | 1.66            | 1.55                | 1.5                   |
| Clashscore                                | 4.9             | 4.82            | 5.34                | 4.55                  |
| Poor rotamers (%)                         | 0.23            | 0.20            | 0.16                | 0.13                  |
| <b>Ramachandran Plot</b>                  |                 |                 |                     |                       |
| Disallowed (%)                            | 0.03            | 0.09            | 0.05                | 0.02                  |
| Allowed (%)                               | 3.60            | 5.67            | 3.84                | 3.87                  |
| Favored (%)                               | 96.37           | 94.24           | 96.11               | 96.1                  |

842

843

844

845

846

847 Summary of parameters used during cryo-EM data collection and processing.

848 Refinement and validation statistics are provided for the post state models.
